# Supplementary material for: A ‘Plug and Play’ Platform for the Production of Diverse Monoterpene Hydrocarbon Scaffolds in Escherichia coli
Source: PubMed Central journal article supplement (PMC5947754; doi:10.1002/slct.201600563), 2016-06-21
Supplement: NIHMS69571-supplement-SI.pdf [file NIHMS69571-supplement-SI.pdf]

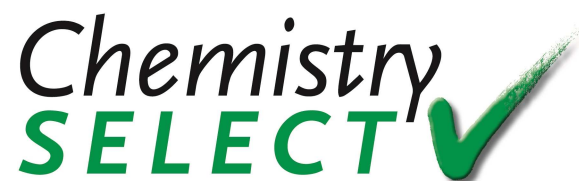

## Supporting Information

© Copyright Wiley-VCH Verlag GmbH & Co. KGaA, 69451 Weinheim, 2016

### **A 'Plug and Play' Platform for the Production of Diverse Monoterpene Hydrocarbon Scaffolds in *Escherichia coli*.**

Nicole G. H. Leferink, Adrian J. Jervis, Ziga Zebec, Helen S. Toogood, Sam Hay, Eriko Takano, and Nigel S. Scrutton\*

## Supporting Information

### Table of contents

#### Experimental Section

|                                                                        |   |
|------------------------------------------------------------------------|---|
| Bacterial strains and media .....                                      | 2 |
| Construction of plasmids .....                                         | 2 |
| Monoterpene production conditions, product capture and detection ..... | 3 |
| Figure S1: Plasmid maps of pMVA and pBbB2a-trAgGPPS(co)-trMslS .....   | 4 |
| Table S1: Strains used in this study .....                             | 5 |
| Table S2: Primers used in this study .....                             | 6 |
| Table S3: Monoterpene synthases used in this study .....               | 7 |
| Table S4: Plasmids used in this study .....                            | 8 |

#### Supporting Results

|                                                                                      |    |
|--------------------------------------------------------------------------------------|----|
| Figure S2: Limonene production titres in different <i>E. coli</i> strains .....      | 9  |
| Figure S3: GCMS analysis of authentic monoterpene standards used in this study ..... | 10 |
| Figure S4: GCMS analysis of monoterpene production strains .....                     | 12 |
| A) (-)aPinS_Pt .....                                                                 | 13 |
| B) SLimS_Ms .....                                                                    | 14 |
| C) RLimS_Cl .....                                                                    | 15 |
| D) gTerS_Ov .....                                                                    | 16 |
| E) (+)aPinS_Pt .....                                                                 | 17 |
| F) CinS_Sf .....                                                                     | 18 |
| G) (-)bPinS_Aa .....                                                                 | 19 |
| H) GerS_Pc .....                                                                     | 20 |
| I) CinS_At .....                                                                     | 21 |
| J) FenS_Lv .....                                                                     | 22 |
| K) SabS_Sp .....                                                                     | 23 |
| L) aTerS_Mg .....                                                                    | 24 |
| M) OciS_Am .....                                                                     | 25 |
| N) CamS_Sl .....                                                                     | 26 |
| O) CinS_Cu .....                                                                     | 27 |
| P) (-)aPinS_Ps .....                                                                 | 28 |
| Q) CarS_Pa .....                                                                     | 29 |
| R) GerS_Ob .....                                                                     | 30 |
| S) GerS_Ct .....                                                                     | 31 |
| T) RLinS_Aa .....                                                                    | 32 |
| Table S5: Product profiles and monoterpene titres of production strains .....        | 33 |
| Table S6: Overview of all linear monoterpenoids produced .....                       | 34 |
| Table S7: Overview of all monocyclic monoterpenoids produced .....                   | 35 |
| Table S8: Overview of all bicyclic monoterpenoids produced .....                     | 36 |
| Table S9: Overview of all additional terpenoids produced .....                       | 37 |
| Figure S5: Titres produced in the platform vs. previously published titres .....     | 38 |
| Figure S6: Monoterpene, geranoid and farnesol titres for each strain .....           | 39 |
| References .....                                                                     | 40 |

## Experimental Section

### Bacterial strains and media

All *E. coli* strains (Table S1) were routinely grown in Lysogeny Broth (LB) or on LB agar plates including antibiotic supplements as appropriate (ampicillin, 100  $\mu\text{g ml}^{-1}$ ; kanamycin, 50  $\mu\text{g mL}^{-1}$ ). Cloning and plasmid propagation was performed using *E. coli*  $\alpha$ -Select (Bioline).

### Construction of plasmids

To construct plasmid pMVA (Figure S1, panel A), the hybrid MVA pathway and *E. coli idi* (*Ecidi*), including 5' PlacUV5 was PCR amplified using primers MVA-F and MVA-R (Table S9) from pJBEI-6410<sup>[1]</sup>. The p15a origin of replication was similarly amplified using primers p15a-F and p15a-R and a kanamycin resistance cassette was amplified from pBbA1k-RFP<sup>[2]</sup> using primers kan-F and kan-R. These fragments were phosphorylated and assembled using the ligase cycling reaction with bridging oligos brMBAori, brorikan, crkanMVA (Table S2) as previously described<sup>[3]</sup>.

pBbB2a-trAgGPPS(co)-trMsLS (Figure S1, panel B) was constructed by insertion of *Abies grandis* GPPS2 (GPPS\_Ag) and *Mentha spicata* (*limS\_Ms*) into plasmid pBbB2a-RFP<sup>[2]</sup>. The predicted plastidial signal sequence was removed from both *limS\_Ms* and GPPS\_Ag, as previously reported<sup>[1, 4]</sup> and were codon-optimised for expression in *E. coli* (GeneArt, Life Technologies) and The Ribosome Binding Site Calculator<sup>[5]</sup> was used to design bespoke 5' untranslated regions (UTRs) encoding a RBS sites for each gene (A.U.=15,000) and to remove any potential aberrant, mid-gene translational start sites (A.U.<1,000). The *limS\_Ms* unit (including 5' UTR) was flanked with HindIII and BamHI restriction sites and both gene units were synthesised together (GeneArt) flanked by EcoRI and XhoI restriction sites, for subcloning into pBbB2a-GFP.

For production of other monoterpenoids the *limS\_Ms* gene was replaced by genes encoding various other monoterpene synthases (Table S3). Synthetic genes encoding monoterpene synthases without plastidial signal sequences were codon-optimised for expression in *E. coli* and sub-cloned into the NcoI-XhoI restriction sites of pETM-11 (a modified version of the pET24-b vector, Novagen), fused to a TEV protease cleavable N-terminal His<sub>6</sub>-tag. Monoterpene synthase genes, including RBS, were amplified from the pETM-11 plasmids using primers pETM-11\_Fw and pETM-11\_Rv (Table S2). PCR fragments were cloned between the HindIII and BamHI sites of the pBbB2a-trAgGPPS(co)-trMsLS, thereby removing the original *limS\_Ms* gene. The 3 geraniol synthase genes (*GerS\_Ob*, *GerS\_PC* and *GerS\_Ct*) were cloned by InFusion (Takara) after PCR amplification (primer pairs trObGES\_Fv-over / trObGES\_Rv-over, trPcGES\_Fv-over / trPcGES\_Rv-over, trCtGES\_Fv-over / trCtGES\_Rv-over, Table S2) into plasmid pGPPSmTC/S15 which was PCR linearized (pLimS\_inverse\_rev/ pLimS\_inverse\_Fw, Table S2).

The control plasmid pBbGPPS, without mTC/S was constructed by amplification of the complete tp pSBC000339 plasmid except *limS\_Ms* using primers pBbGPPS\_Fw and pBbGPPS\_Rv, the resulting PCR product was digested with HindIII and subsequently self-ligated.

### **Monoterpene production conditions, product capture and detection**

Expression strains were inoculated with freshly transformed colonies into 3 ml terrific broth (TB) supplemented with 0.4 % glucose and antibiotics in 28 ml glass screw capped vials. Cultures were grown for 7 h at 37 °C with shaking at 200 rpm before transferring to 30 °C and induction with 50 µM (isopropyl β-D-1-thiogalactopyranoside) IPTG and 25 nM anhydro-tetracycline (aTet) and overlaid with a 20 % *n*-nonane layer followed by incubation for 72 h with shaking at 200 rpm.

$A_{600}$  readings were taken of the aqueous phase, and nonane layers were harvested and clarified by centrifugation (14,000 rpm, 3 min, 4°C), dried over anhydrous  $MgSO_4$  and mixed 1:1 with ethyl acetate containing 0.1 % sec-butyl benzene.

Monoterpene products were analysed by GCMS using an Agilent Technologies 7890B GC equipped with an Agilent Technologies 5977A MSD. The products were separated on a DB-WAX column (30 m x 0.32 mm i.d., 0.25 µM film thickness, Agilent Technologies). The injector temperature was set at 240°C with a split ratio of 20:1 (1 µL injection). The carrier gas was helium with a flow rate of 1 mL/min and a pressure of 5.1 psi. The following oven program was used: 50°C (1 min hold), ramp to 68°C at 5°C/min (2 min hold), and ramp to 230°C at 25°C/min (2 min hold). The ion source temperature of the mass spectrometer (MS) was set to 230°C and spectra were recorded from  $m/z$  50 to  $m/z$  250. Compound identification was carried out using authentic standards and comparison to reference spectra in the NIST library of MS spectra and fragmentation patterns.

Monoterpenoids were quantified using authentic standards wherever possible, using experimentally determined relative response factors in relation to the internal standard used. In the absence of an authentic standard concentrations were estimated using a relative response factor of 1.

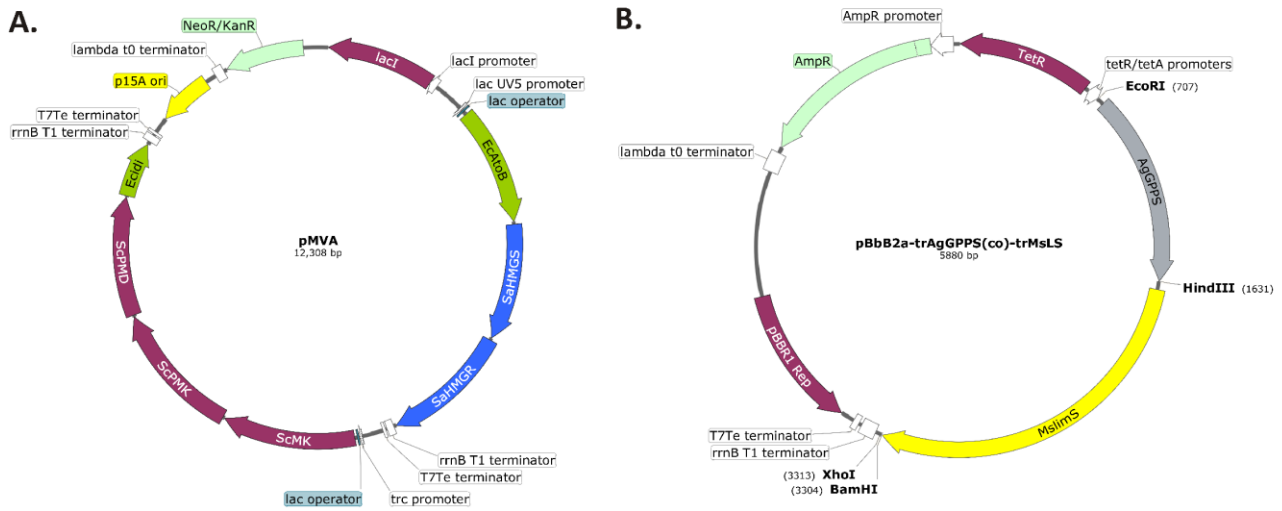

**Figure S1: Plasmid maps of pMVA (A) and pBbB2a-trAgGPPS(co)-trMsLS (B).** Figures were prepared using the SnapGene software package.

**Table S1: Strains used in this study**

| Strain name                      | Strain | Reference           |
|----------------------------------|--------|---------------------|
| <b>Chassis</b>                   |        |                     |
| DH5 $\alpha$ ( $\alpha$ -Select) | K-12   | Bioline             |
| MG1655                           | K-12   | [6]                 |
| W3110                            | K-12   | [7]                 |
| DH1                              | K-12   | [8]                 |
| MDS42 Meta                       | K-12   | Scarab Genomics     |
| BL21 ( $\lambda$ DE3)            | B      | New England Biolabs |
| Mach1                            | W      | Thermo-Fisher       |
| <b>Production strain</b>         |        |                     |
| DH5 $\alpha$ ( $\alpha$ -Select) | K-12   | Bioline             |

**Table S2: Primers used in this study**

| Primer            | Sequence (5'-3')                                                    |
|-------------------|---------------------------------------------------------------------|
| JBEIMVA-F         | ATTTAGAAAAATAAACAAATAGGGGTTC                                        |
| JBEIMVA-R         | TTATTTAAGCTGGGTAAATGCAG                                             |
| p15a-F            | GGATCCAAACTCGAGTAAGG                                                |
| p15a-R            | GGTAACTGTCAGACCAAGTTTAC                                             |
| kan-F             | TCGACGTCGGAATGCCCAGC                                                |
| kan-R             | TCAGAAGAACTCGTCAAGAAGG                                              |
| brMVAori          | GCCAGAAAACGATTATCTGCATTTACCCAGCTTAAATAAGGATCCAAACTCGAGTAAGGATCTCCAG |
| brorikan          | AAGCGAGCTCGTAAACTTGGTCTGACAGTTACCTCAGAAGAACTCGTCAAGAAGGCGATAGAAGGC  |
| brkanMVA          | CCCCAGCTGGCAATTCCGACGTCGAATTTAGAAAAATAAACAAATAGGGGTTCGCGCACATTTTC   |
| pETM-11_Fw        | CGCGCGAAGCTTAATAATTTGATTTAAC                                        |
| pETM-11_Rv        | ATGGATCCCTTTGTAGCAGCCGGATC                                          |
| pBbGPPS_Fw        | CCCAAGCTTAAACTCGAGTAAGGATCTCC                                       |
| pBbGPPS_Rv        | CCCAAGCTTAATTCTGACGAAATGC                                           |
| pLimS_inverse_rev | GGCGCCCTGAAAAATAAGAT                                                |
| pLimS_inverse_Fw  | TAATAACTCGAGCACCACCACC                                              |
| trObGES_Rv        | CTGGGTAAAAAACAGGGCAT                                                |
| trObGES_Fv        | ATGGAAGAAAGCAGCAGCAA                                                |
| trObGES_Fv-over   | ATCTTTATTTTCAGGGCGCCATGGAAGAAAGCAGCAGCAA                            |
| trObGES_Rv-over   | TGGTGGTGCTCGAGTTATTACTGGGTAAAAAACAGGGCAT                            |
| trPcGES_Fv-over   | ATCTTTATTTTCAGGGCGCCATGGCAGTCGTAGCGGTAATTATCA                       |
| trPcGES_Rv-over   | TGGTGGTGCTCGAGTTATTAAACATACGGCTCAAACATCAGA                          |
| trCtGES_Fv-over   | ATCTTTATTTTCAGGGCGCCATGGCAGTCGTAGCGGTAACATATAAA                     |
| trCtGES_Rv-over   | TGGTGGTGCTCGAGTTATTATGCGCTACCACCATCAACA                             |

**Table S3: Monoterpene synthase genes used in this study.** All synthetic genes were codon optimised for use in *E. coli*, fused to a cleavable N-terminal His<sub>6</sub>-tag, and, if present, the N-terminal plastid sequence was omitted.

| Name        | Source                        | Main product          | Uniprot nr. | Reference  |
|-------------|-------------------------------|-----------------------|-------------|------------|
| CamS_Ag     | <i>Abies grandis</i>          | Camphene              | Q948Z0      | [9]        |
| CamS_Sl     | <i>Solanum lycopersicum</i>   | Camphene              | G1JUH1      | [10]       |
| CarS_Pa     | <i>Picea abies</i>            | 3-Carene              | Q84SM8      | [11]       |
| CarS_Ps     | <i>Picea sitchensis</i>       | 3-Carene              | F1CKI6      | [12]       |
| CinS_Sf     | <i>Salvia fruticosa</i>       | 1,8-Cineole           | A6XH05      | [13]       |
| CinS_Cu     | <i>Citrus unshiu</i>          | 1,8-Cineole           | Q5CD82      | [14]       |
| CinS_At     | <i>Arabidopsis thaliana</i>   | 1,8-Cineole           | P0DI76      | [15]       |
| FenS_Ob     | <i>Ocimum basilicum</i>       | Fenchol               | Q5SBP2      | [16]       |
| FenS_Lv     | <i>Lavandula viridis</i>      | Fenchol               | T1RR72      | This study |
| GerS_Pc     | <i>Perilla citriodora</i>     | Geraniol              | Q4JHG3      | [17]       |
| GerS_Ob     | <i>Ocimum basilicum</i>       | Geraniol              | Q6USK1      | [18]       |
| GerS_Ct     | <i>Cinnamomum tenuipilum</i>  | Geraniol              | Q8GUE4      | [19]       |
| RLimS_Cl    | <i>Citrus lemon</i>           | (+)-(4R)-Limonene     | Q8L5K3      | [20]       |
| RLimS_La    | <i>Lavandula angustivolia</i> | (+)-(4R)-Limonene     | Q2XSC6      | [21]       |
| SLimS_Ms    | <i>Mentha spicata</i>         | (-)-(4S)-Limonene     | Q40322      | [22]       |
| RLinS_Aa    | <i>Artemisia annua</i>        | (-)-(3R)-linalool     | Q9SPN0      | [23]       |
| SLinS_At    | <i>Arabidopsis thaliana</i>   | (+)-(3S)-linalool     | Q84UV0      | [24]       |
| MyrS_Ag     | <i>Abies grandis</i>          | $\beta$ -Myrcene      | O24474      | [9, 25]    |
| MyrS_Ca     | <i>Coffea arabica</i>         | $\beta$ -Myrcene      | R4YXW8      | [26]       |
| MyrS_At     | <i>Arabidopsis thaliana</i>   | $\beta$ -Myrcene      | Q9ZUH4      | [27]       |
| OciS_Cu     | <i>Citrus unshiu</i>          | (E)- $\beta$ -ocimene | Q5CD81      | [14]       |
| OciS_Am     | <i>Antirrhinum majus</i>      | (E)- $\beta$ -ocimene | Q84NC8      | [28]       |
| PheS_Ag     | <i>Abies grandis</i>          | $\beta$ -phellandrene | Q9M7D1      | [9]        |
| PheS_La     | <i>Lavandula angustivolia</i> | $\beta$ -phellandrene | E9N3U9      | [29]       |
| PheS_Sl     | <i>Solanum lycopersicum</i>   | $\beta$ -phellandrene | C1K5M3      | [30]       |
| (-)aPinS_Ps | <i>Picea sitchensis</i>       | (-)- $\alpha$ -pinene | Q84KL6      | [31]       |
| (-)aPinS_Pt | <i>Pinus taeda</i>            | (-)- $\alpha$ -pinene | Q84KL6      | [32]       |
| (+)aPinS_Pt | <i>Pinus taeda</i>            | (+)- $\alpha$ -pinene | Q84KL3      | [32]       |
| (-)bPinS_Aa | <i>Artemisia annua</i>        | (-)- $\beta$ -pinene  | Q94G53      | [33]       |
| SabS_Ps     | <i>Picea sitchensis</i>       | Sabinene              | F1CKJ1      | [12]       |
| SabS_Sp     | <i>Salvia pomifera</i>        | Sabinene              | A6XH06      | [13]       |
| gTerS_Cs    | <i>Coriandrum sativum</i>     | $\gamma$ -Terpinene   | A0A059SVE6  | [34]       |
| gTerS_Ov    | <i>Origanum vulgare</i>       | $\gamma$ -Terpinene   | E2E2P0      | [35]       |
| aTerS_Mg    | <i>Magnolia grandiflora</i>   | $\alpha$ -Terpineol   | B3TPQ7      | [36]       |
| aTerS_Sa    | <i>Santalum album</i>         | $\alpha$ -Terpineol   | B5A434      | [37]       |
| TerS_Ob     | <i>Ocimum basilicum</i>       | Terpinolene           | Q5SBP0      | [16]       |
| TerS_Pm     | <i>Pseudotsuga menziesii</i>  | Terpinolene           | Q4QSN6      | [38]       |



**Table S4: Plasmids used in this study**

| Plasmid reference | Plasmid name                                      | Description (Origin of replication, Antibiotic marker, Reference(s), Promoters and Operons) | Reference(s) |
|-------------------|---------------------------------------------------|---------------------------------------------------------------------------------------------|--------------|
| pJBEI-6410        | pBbA5a-MTSAe-T1f-MBI(f)-T1002i-Ptrc-trGPPS(co)-LS | p15A, Ampr, PlacUV5, MTSA, T1, MBI-f, T1002, Ptrc, trGPPS, LS                               | [1]          |
| pSBC000338        | pBbA5a-MTSAe-T1f-MBI(f)-T1002i                    | p15A, Kanr, PlacUV5, MTSA, T1, MBI-f, T1002                                                 | This study   |
| pSBC000339        | pBbB2a-trAgGPPS(co)-trMsLS                        | pBBR, Ampr, Ptet, trAgGPPS(co)-trMsLS                                                       | This study   |
| pGPPS             | pBbB2a-trAgGPPS(co)                               | pBBR, Ampr, Ptet, trAgGPPS(co)                                                              | This study   |
| pGPPSmTC/S1       | pBbB2a-trAgGPPS(co)-trCamS_Ag                     | pBBR, Ampr, Ptet, trAgGPPS(co)- trCamS_Ag                                                   | This study   |
| pGPPSmTC/S2       | pBbB2a-trAgGPPS(co)-trCamS_Sl                     | pBBR, Ampr, Ptet, trAgGPPS(co)- trCamS_Sl                                                   | This study   |
| pGPPSmTC/S3       | pBbB2a-trAgGPPS(co)-trCarS_Pa                     | pBBR, Ampr, Ptet, trAgGPPS(co)- trCarS_Pa                                                   | This study   |
| pGPPSmTC/S4       | pBbB2a-trAgGPPS(co)-trCarS_Ps                     | pBBR, Ampr, Ptet, trAgGPPS(co)- trCarS_Ps                                                   | This study   |
| pGPPSmTC/S5       | pBbB2a-trAgGPPS(co)-trCinS_Sf                     | pBBR, Ampr, Ptet, trAgGPPS(co)- trCinS_Sf                                                   | This study   |
| pGPPSmTC/S6       | pBbB2a-trAgGPPS(co)-trCinS_Cu                     | pBBR, Ampr, Ptet, trAgGPPS(co)- trCinS_Cu                                                   | This study   |
| pGPPSmTC/S7       | pBbB2a-trAgGPPS(co)-trCinS_At                     | pBBR, Ampr, Ptet, trAgGPPS(co)- trCinS_At                                                   | This study   |
| pGPPSmTC/S8       | pBbB2a-trAgGPPS(co)-trFenS_Ob                     | pBBR, Ampr, Ptet, trAgGPPS(co)- trFenS_Ob                                                   | This study   |
| pGPPSmTC/S9       | pBbB2a-trAgGPPS(co)-trFenS_Lv                     | pBBR, Ampr, Ptet, trAgGPPS(co)- trFenS_Lv                                                   | This study   |
| pGPPSmTC/S10      | pBbB2a-trAgGPPS(co)-trGerS_Pc                     | pBBR, Ampr, Ptet, trAgGPPS(co)- trGerS_Pc                                                   | This study   |
| pGPPSmTC/S11      | pBbB2a-trAgGPPS(co)-trGerS_Ob                     | pBBR, Ampr, Ptet, trAgGPPS(co)- trGerS_Ob                                                   | This study   |
| pGPPSmTC/S12      | pBbB2a-trAgGPPS(co)-trGerS_Ct                     | pBBR, Ampr, Ptet, trAgGPPS(co)- trGerS_Ct                                                   | This study   |
| pGPPSmTC/S13      | pBbB2a-trAgGPPS(co)-trRLimS_Cl                    | pBBR, Ampr, Ptet, trAgGPPS(co)- trRLimS_Cl                                                  | This study   |
| pGPPSmTC/S14      | pBbB2a-trAgGPPS(co)-trRLimS_La                    | pBBR, Ampr, Ptet, trAgGPPS(co)- trRLimS_La                                                  | This study   |
| pGPPSmTC/S15      | pBbB2a-trAgGPPS(co)-trSLimS_Ms                    | pBBR, Ampr, Ptet, trAgGPPS(co)- trSLimS_Ms                                                  | This study   |
| pGPPSmTC/S16      | pBbB2a-trAgGPPS(co)-trRLinS_Aa                    | pBBR, Ampr, Ptet, trAgGPPS(co)- trRLinS_Aa                                                  | This study   |
| pGPPSmTC/S17      | pBbB2a-trAgGPPS(co)-trSLinS_At                    | pBBR, Ampr, Ptet, trAgGPPS(co)- trSLinS_At                                                  | This study   |
| pGPPSmTC/S18      | pBbB2a-trAgGPPS(co)-trMyrS_Ag                     | pBBR, Ampr, Ptet, trAgGPPS(co)- trMyrS_Ag                                                   | This study   |
| pGPPSmTC/S19      | pBbB2a-trAgGPPS(co)-trMyrS_Ca                     | pBBR, Ampr, Ptet, trAgGPPS(co)- trMyrS_Ca                                                   | This study   |
| pGPPSmTC/S20      | pBbB2a-trAgGPPS(co)-trMyrS_At                     | pBBR, Ampr, Ptet, trAgGPPS(co)- trMyrS_At                                                   | This study   |
| pGPPSmTC/S21      | pBbB2a-trAgGPPS(co)-trOciS_Cu                     | pBBR, Ampr, Ptet, trAgGPPS(co)- trOciS_Cu                                                   | This study   |
| pGPPSmTC/S22      | pBbB2a-trAgGPPS(co)- trOciS_Am                    | pBBR, Ampr, Ptet, trAgGPPS(co)- trOciS_Am                                                   | This study   |
| pGPPSmTC/S23      | pBbB2a-trAgGPPS(co)- trPheS_Ag                    | pBBR, Ampr, Ptet, trAgGPPS(co)- trPheS_Ag                                                   | This study   |
| pGPPSmTC/S24      | pBbB2a-trAgGPPS(co)- trPheS_La                    | pBBR, Ampr, Ptet, trAgGPPS(co)- trPheS_La                                                   | This study   |
| pGPPSmTC/S25      | pBbB2a-trAgGPPS(co)- trPheS_Sl                    | pBBR, Ampr, Ptet, trAgGPPS(co)- trPheS_Sl                                                   | This study   |
| pGPPSmTC/S26      | pBbB2a-trAgGPPS(co)- tr(-)aPinS_Ps                | pBBR, Ampr, Ptet, trAgGPPS(co)- tr(-)aPinS_Ps                                               | This study   |
| pGPPSmTC/S27      | pBbB2a-trAgGPPS(co)- tr(-)aPinS_Pt                | pBBR, Ampr, Ptet, trAgGPPS(co)- tr(-)aPinS_Pt                                               | This study   |
| pGPPSmTC/S28      | pBbB2a-trAgGPPS(co)- tr(+)aPinS_Pt                | pBBR, Ampr, Ptet, trAgGPPS(co)- tr(+)aPinS_Pt                                               | This study   |
| pGPPSmTC/S29      | pBbB2a-trAgGPPS(co)- tr(-)bPinS_Aa                | pBBR, Ampr, Ptet, trAgGPPS(co)- tr(-)bPinS_Aa                                               | This study   |
| pGPPSmTC/S30      | pBbB2a-trAgGPPS(co)- trSabS_Ps                    | pBBR, Ampr, Ptet, trAgGPPS(co)- trSabS_Ps                                                   | This study   |
| pGPPSmTC/S31      | pBbB2a-trAgGPPS(co)- trSabS_Sp                    | pBBR, Ampr, Ptet, trAgGPPS(co)- trSabS_Sp                                                   | This study   |
| pGPPSmTC/S32      | pBbB2a-trAgGPPS(co)- trgTerS_Cs                   | pBBR, Ampr, Ptet, trAgGPPS(co)- trgTerS_Cs                                                  | This study   |
| pGPPSmTC/S33      | pBbB2a-trAgGPPS(co)- trgTerS_Ov                   | pBBR, Ampr, Ptet, trAgGPPS(co)- trgTerS_Ov                                                  | This study   |
| pGPPSmTC/S34      | pBbB2a-trAgGPPS(co)- traTerS_Mg                   | pBBR, Ampr, Ptet, trAgGPPS(co)- traTerS_Mg                                                  | This study   |
| pGPPSmTC/S35      | pBbB2a-trAgGPPS(co)- traTerS_Sa                   | pBBR, Ampr, Ptet, trAgGPPS(co)- traTerS_Sa                                                  | This study   |
| pGPPSmTC/S36      | pBbB2a-trAgGPPS(co)- trTerS_Ob                    | pBBR, Ampr, Ptet, trAgGPPS(co)- trTerS_Ob                                                   | This study   |
| pGPPSmTC/S37      | pBbB2a-trAgGPPS(co)- trTerS_Pm                    | pBBR, Ampr, Ptet, trAgGPPS(co)- trTerS_Pm                                                   | This study   |

## Supporting Results

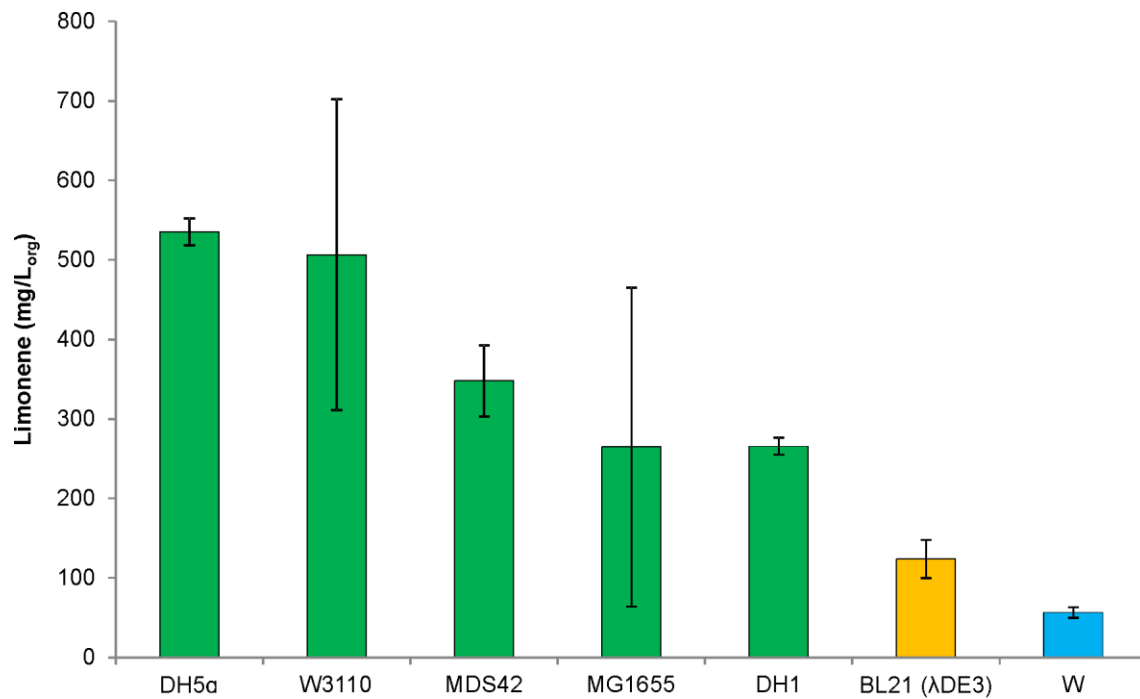

**Figure S2: Limonene production titres in different *E. coli* strains.** Final titres of limonene produced by *E. coli* strains (Table S1) bearing plasmid pJBEI-6410 after 72 h growth in a bi-phasic culture (concentrations in 20 % organic phase), as calculated from GC analysis. Average titres from triplicate biological repeats; error bars represent standard deviation. Bar colour denotes *E. coli* strain type; K-12 (green), B (orange) or W (blue).

Figure S3: GCMS analysis of authentic monoterpene standards.

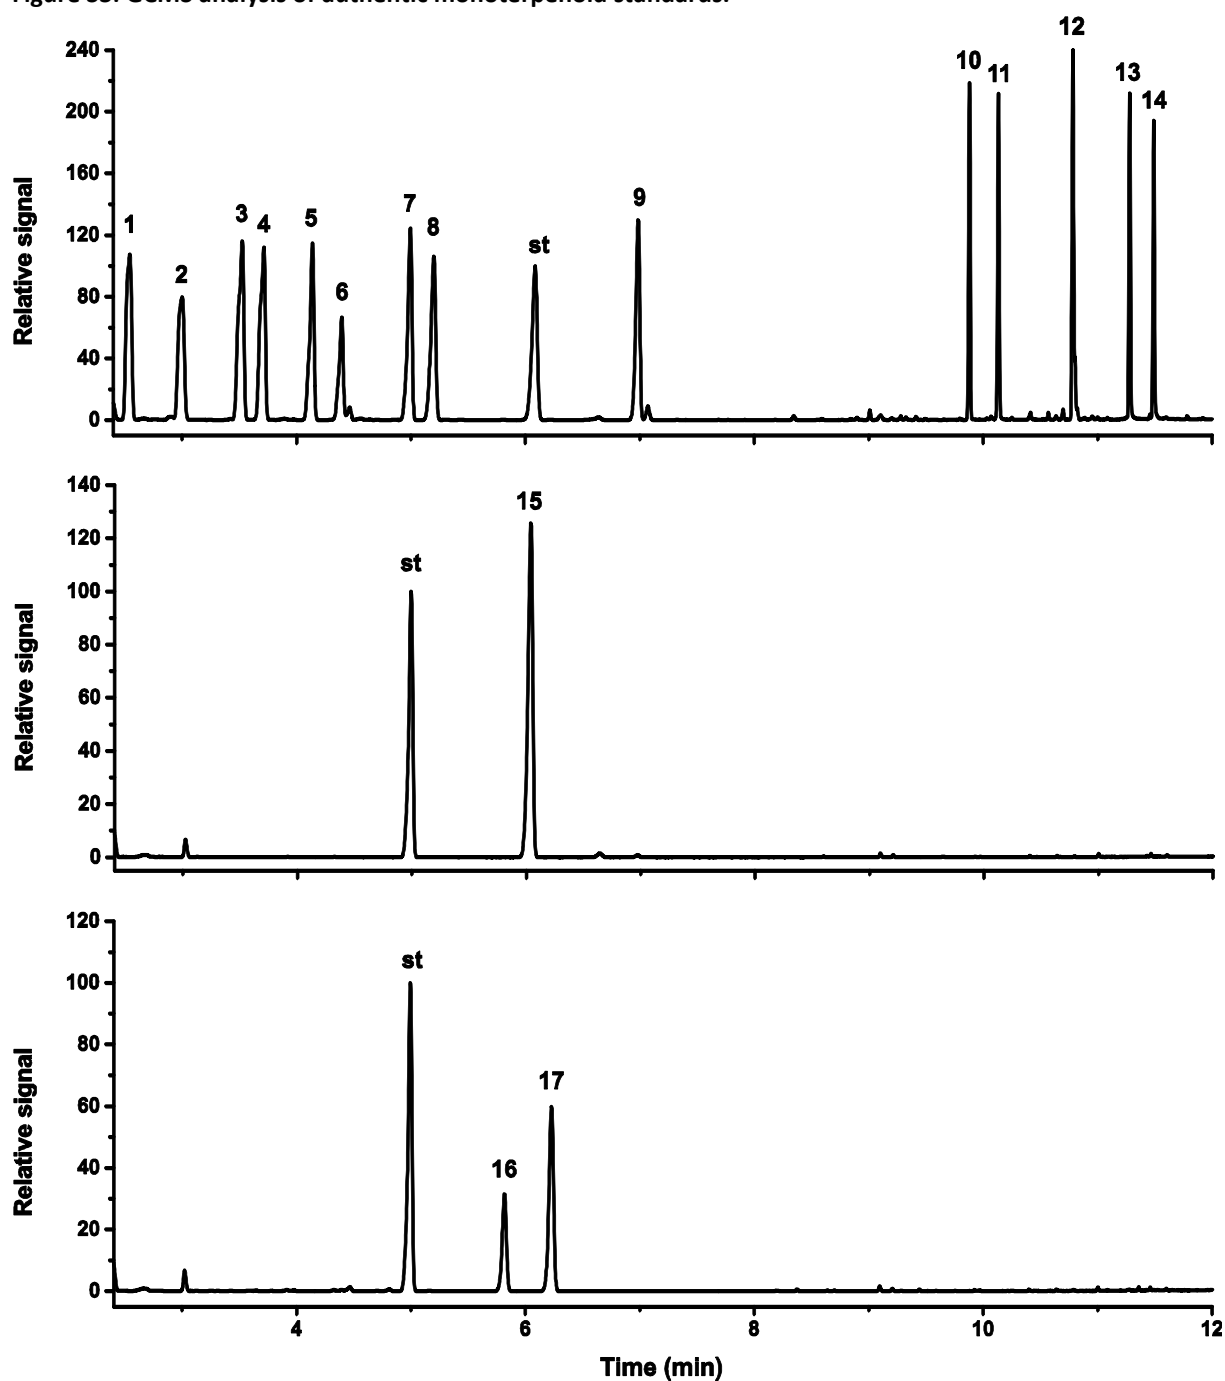

**A) GCMS traces of authentic monoterpene standards.** GCMS traces showing the separation of monoterpenoids ( $1 \text{ mg mL}^{-1}$ ) produced in this study on a DB-WAX column. The internal standard used, *sec*-butylbenzene (0.1%, vv), has a retention time of 6.10 minutes. Peak 1:  $\alpha$ -pinene (rt: 2.544), 2: camphene (rt: 3.001), 3:  $\beta$ -pinene (rt: 3.525), 4: sabinene (rt: 3.714), 5: 3-carene (rt: 4.141), 6:  $\beta$ -myrcene (rt: 4.395), 7: limonene (rt: 4.996), 8: 1,8-cineole (rt: 5.200), 9: terpinolene (rt: 6.985), 10: linalool (rt: 9.881), 11: fenchol (rt: 10.133), 12:  $\alpha$ -terpineol (rt: 10.788), 13: nerol (rt: 11.208), 14: geraniol (rt: 11.490). Because  $\gamma$ -terpinene (rt: 6.040) (peak 15) and (*E*)- $\beta$ -ocimene (rt: 6.226) (peak 17), have similar retention times as *sec*-butylbenzene (rt: 6.085), limonene (0.1% vv) was used as internal standard in  $\beta$ -ocimene and  $\gamma$ -terpinene containing samples. The  $\beta$ -ocimene standard contains about 30% (*Z*)- $\beta$ -ocimene (rt: 5.815) (peak 16). Method: the injector temperature was set at  $240^\circ\text{C}$  with a split ratio of 20:1 ( $1 \mu\text{L}$  injection). The carrier gas was helium with a flow rate of  $1 \text{ mL/min}$  and a pressure of 5.1 psi. The following oven program was used:  $50^\circ\text{C}$  (1 min hold), ramp to  $68^\circ\text{C}$  at  $5^\circ\text{C/min}$  (2 min hold), and ramp to  $230^\circ\text{C}$  at  $25^\circ\text{C/min}$  (2 min hold). The ion source temperature of the mass spectrometer (MS) was set to  $230^\circ\text{C}$  and spectra were recorded from  $m/z$  50 to  $m/z$  250.

B) MS spectra of authentic monoterpenoid standards. Chemical structures are shown as insets.

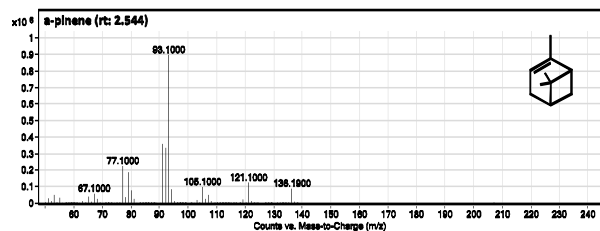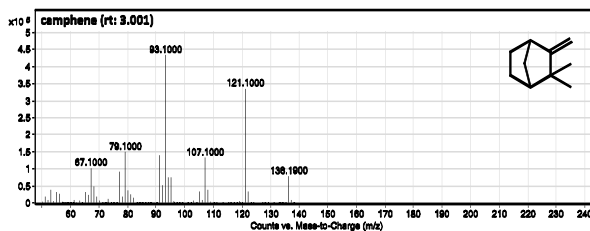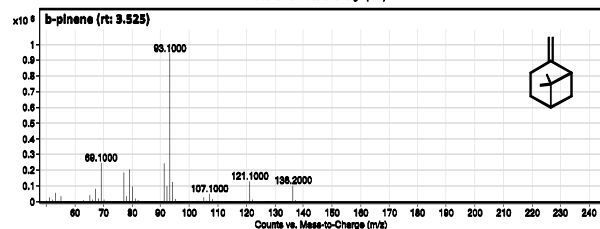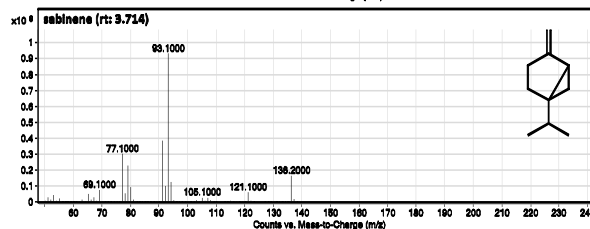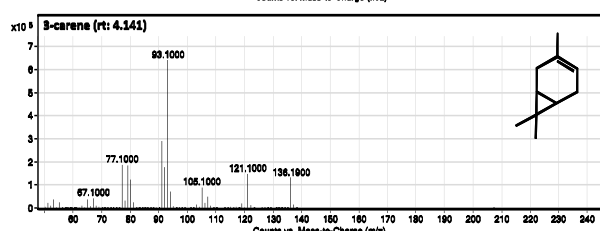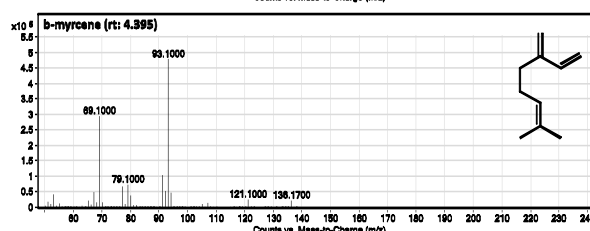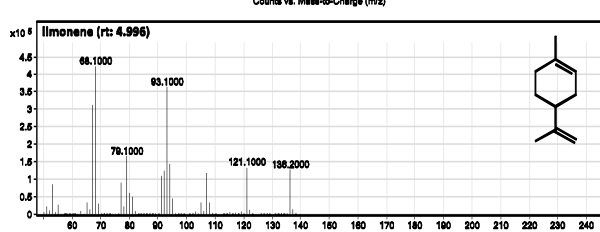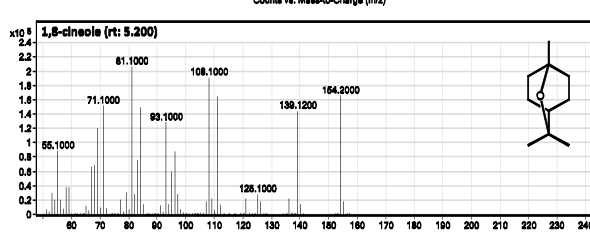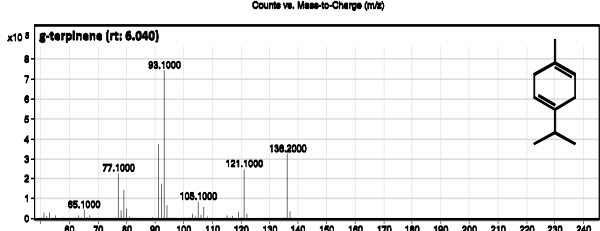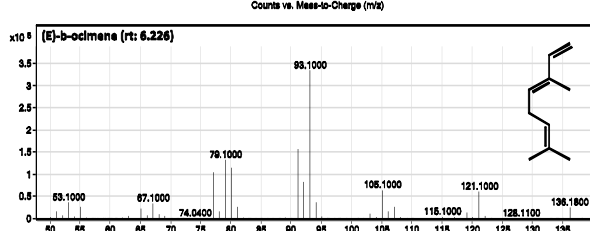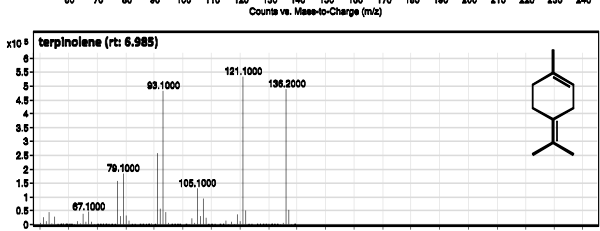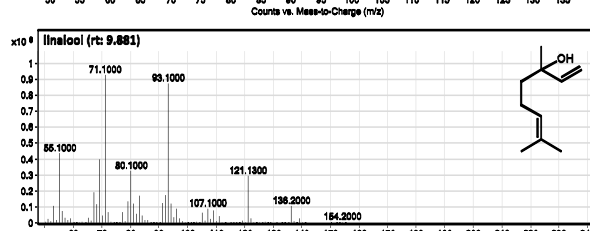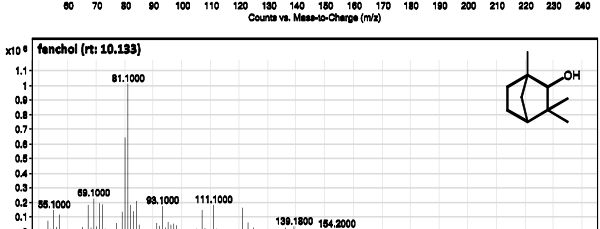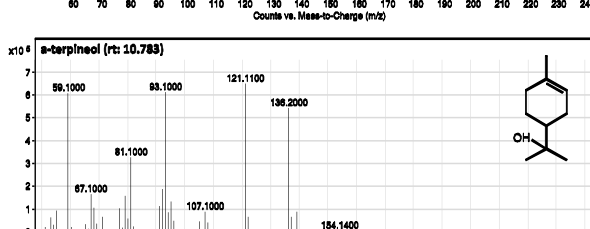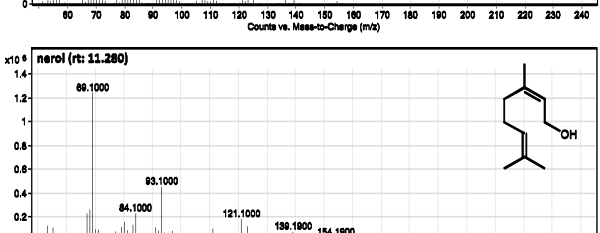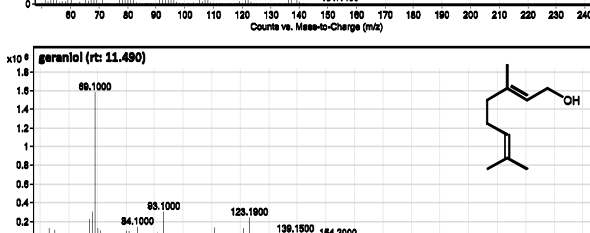

**Figure S4: GCMS analysis monoterpene production strains.** Representative GCMS traces of *n*-nonane overlays obtained from two-phase *E. coli*  $\alpha$ -Select cultures containing pMVA and pGPPSmTC/S plasmids are shown. MS spectra of indicated monoterpene peaks are shown. Retention times of additional terpenoid peaks are mentioned below. Chemical structures of detected monoterpenoids are shown as insets. Retention times and MS spectra of the detected peaks were compared to retention times and MS spectra of authentic standards wherever possible (See Figure S3). No authentic standards were available for the following monoterpenoids which are produced as by-products:  $\beta$ -phellandrene, 4-carene,  $\delta$ -terpineol, sabinene hydrate, thujene, borneol, Pinan-2-ol, citronellal, neral, geranial, and citronellol. Also no authentic standards were available for the sesquiterpene by-products farnesal, farnesene and (*E*)- $\alpha$ -bisabolene. Identification of these compounds was achieved by comparing the obtained MS spectra and fragmentation patterns to the NIST reference library.

### A) (-)- $\alpha$ Pin\_S\_Pt

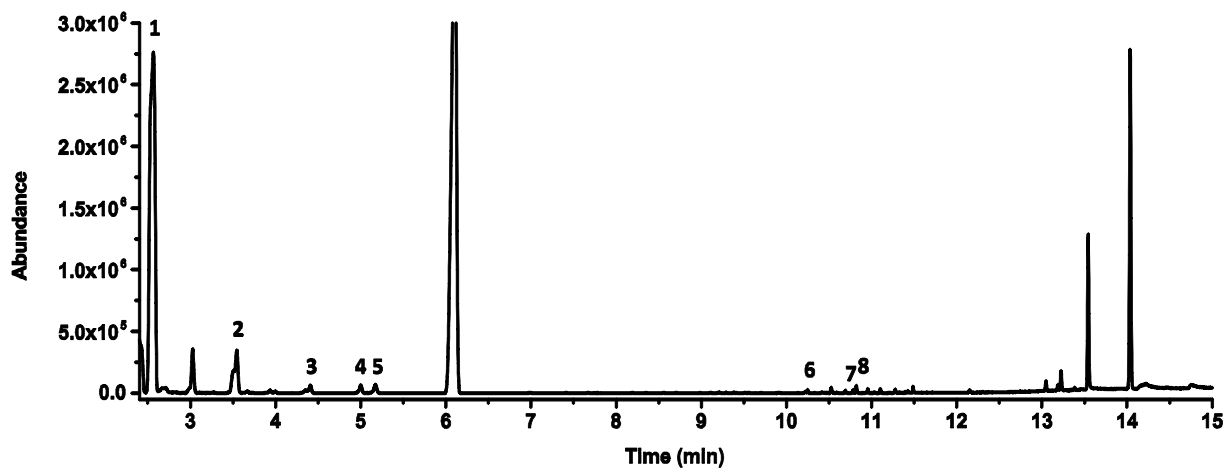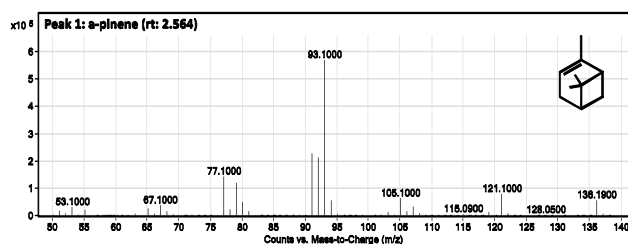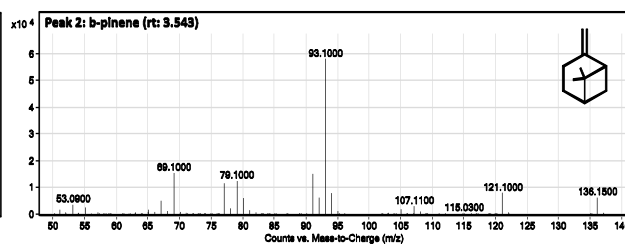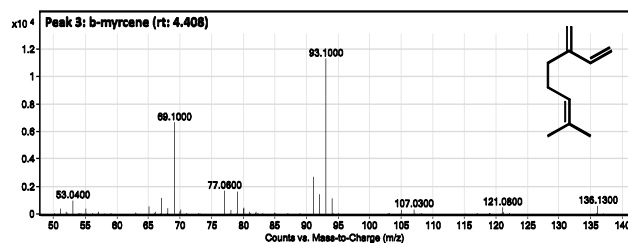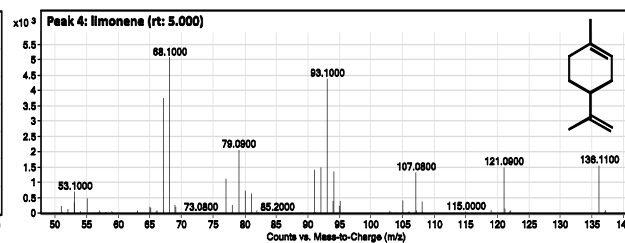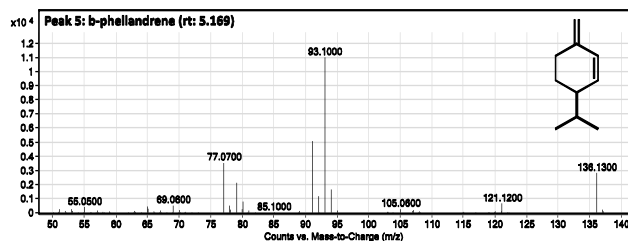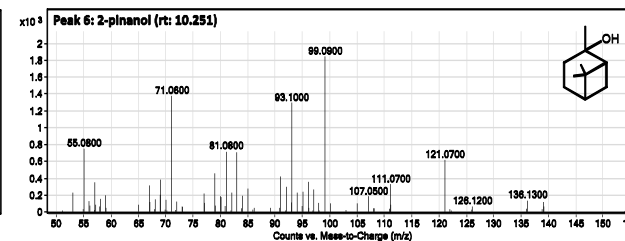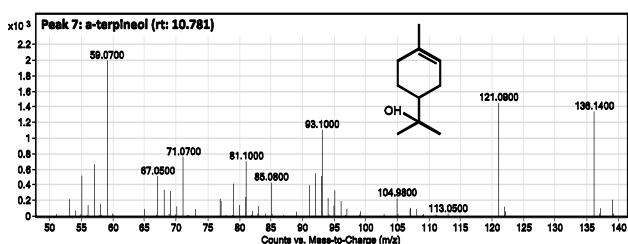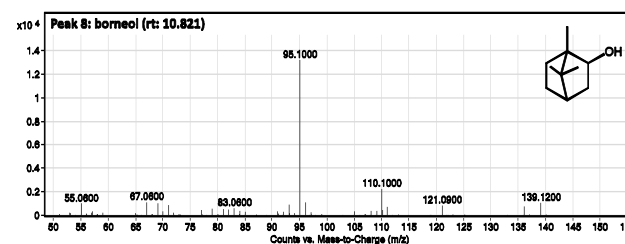

Additional terpenoids detected: geraniol (rt: 10.955), citronellol (rt: 11.101), nerol (rt: 11.278), geraniol (rt: 11.487), farnesal (rt: 13.225), and farnesol (rt: 13.542). The peak at rt 14.037 is indole.

## B) SLimS\_Ms

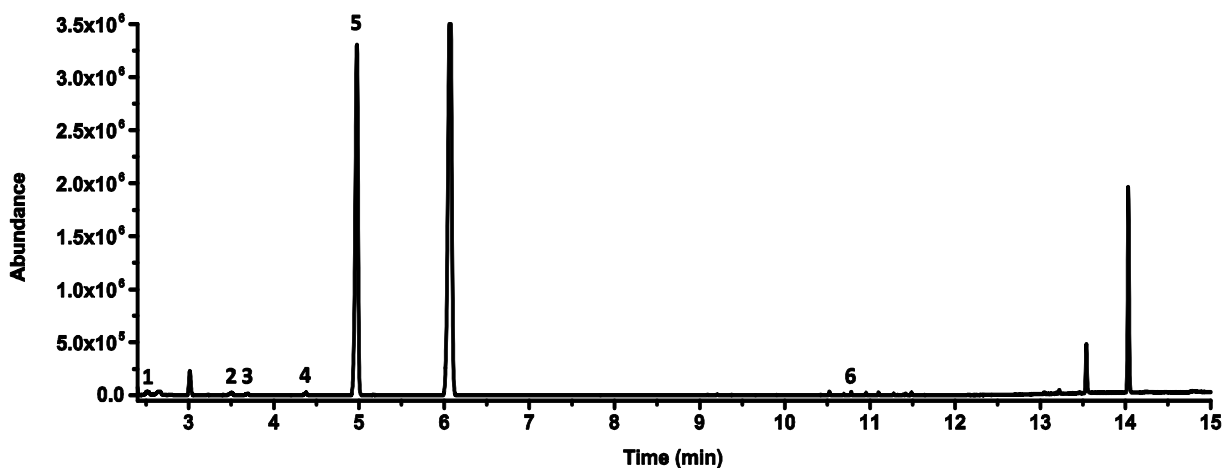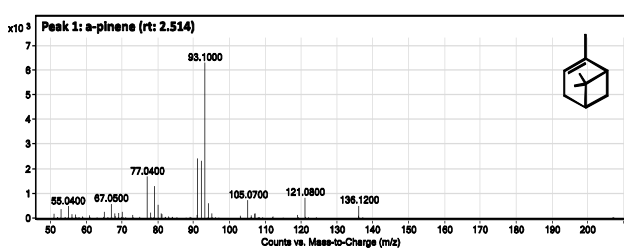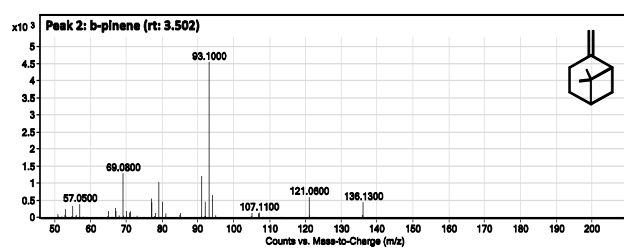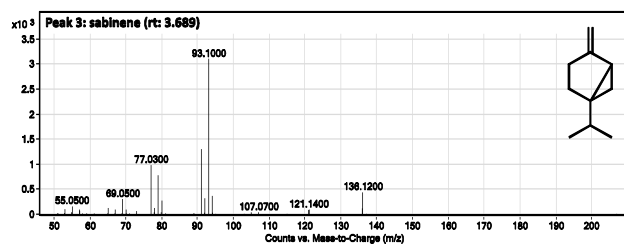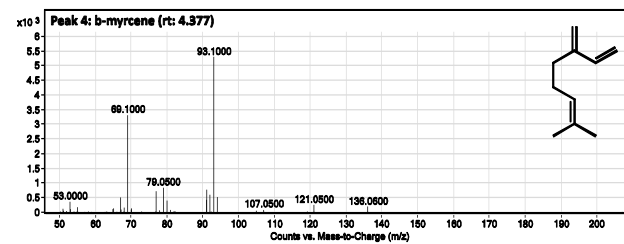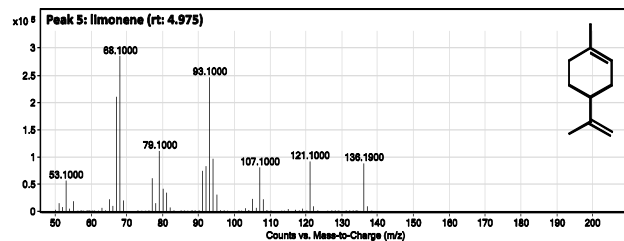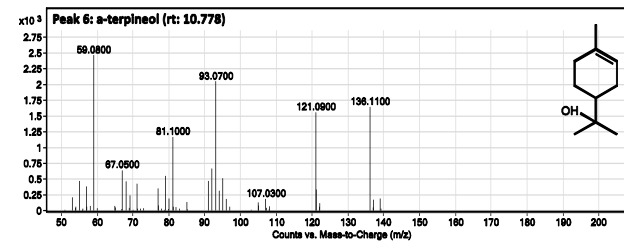

Additional terpenoids detected: geranial (rt: 10.952), citronellol (rt: 11.101), nerol (rt: 11.278), geraniol (rt: 11.487), farnesal (rt: 13.222), and farnesol (rt: 13.540). The peak at rt 14.034 is indole.

### C) RLimS\_Cl

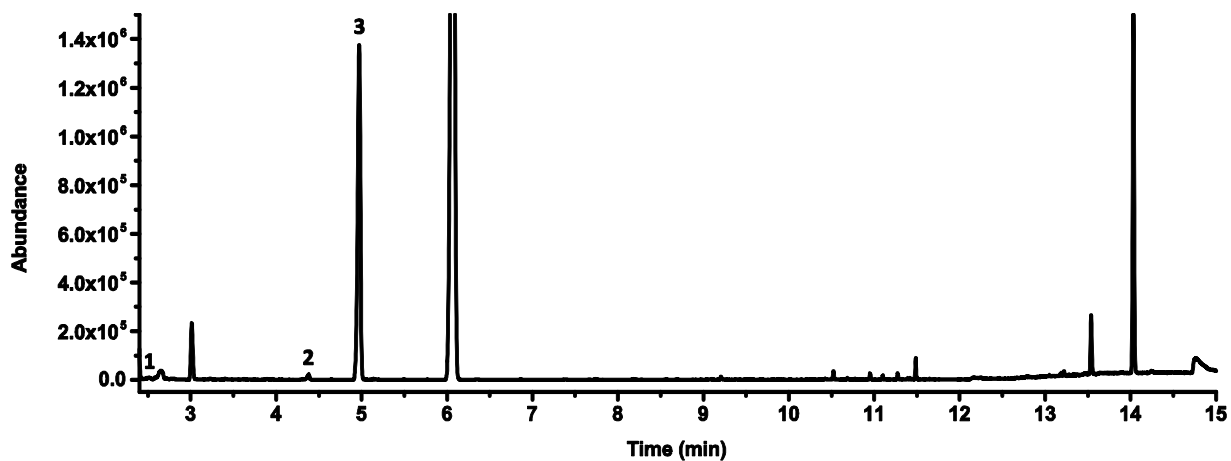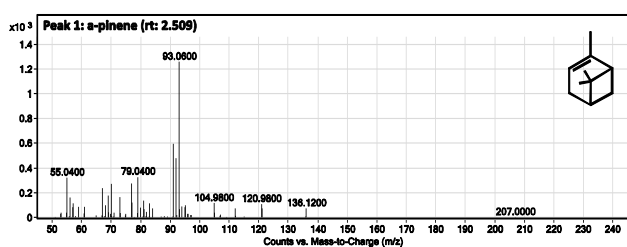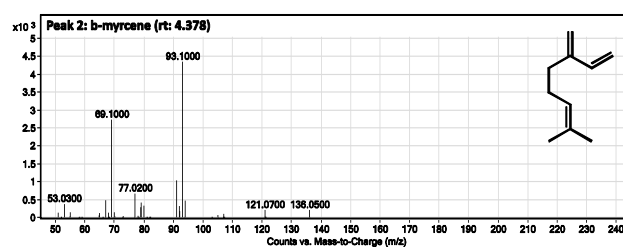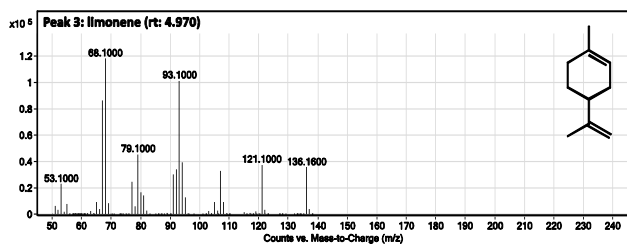

Additional terpenoids detected: geranial (rt: 10.952), citronellol (rt: 11.099), nerol (rt: 11.275), geraniol (rt: 11.484), farnesal (rt: 13.222), and farnesol (rt: 13.540). The peak at rt 14.034 is indole.



### D) gTerS\_Ov

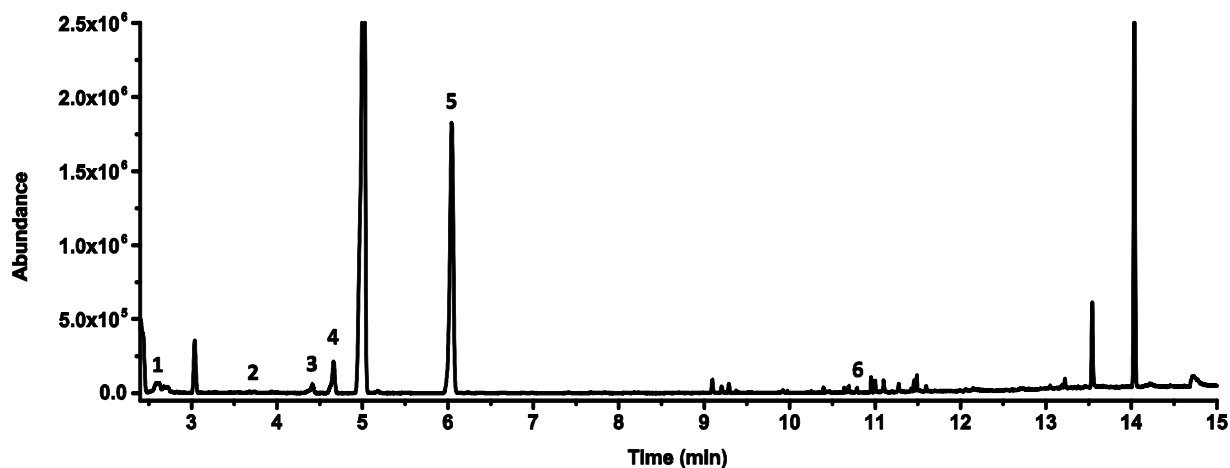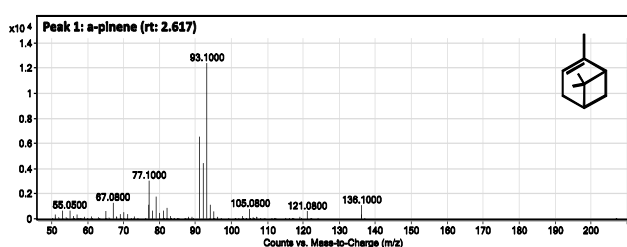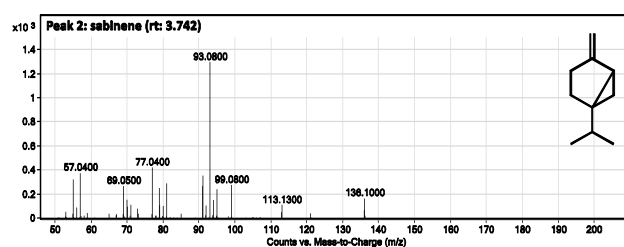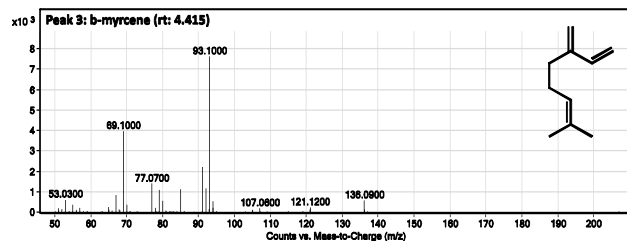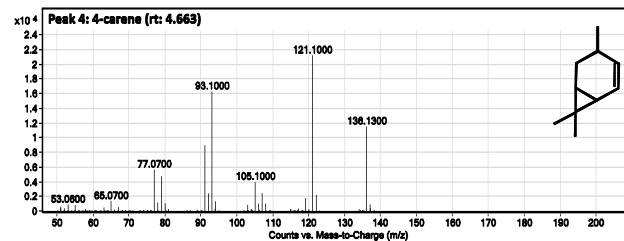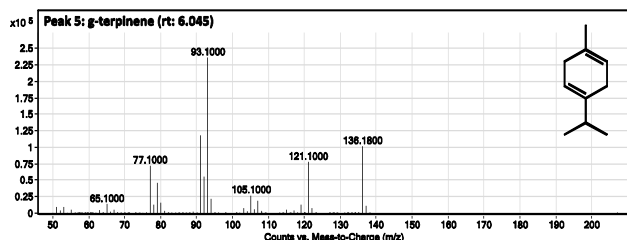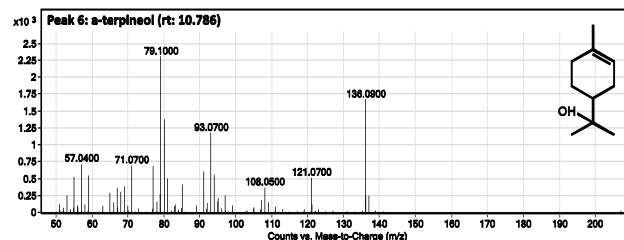

Additional terpenoids detected: citronellol (rt: 11.101), nerol (rt: 11.278), geraniol (rt: 11.489), farnesal (rt: 13.222), and farnesol (rt: 13.542). The peak at rt 14.034 is indole.

E) (+)aPinS\_Pt

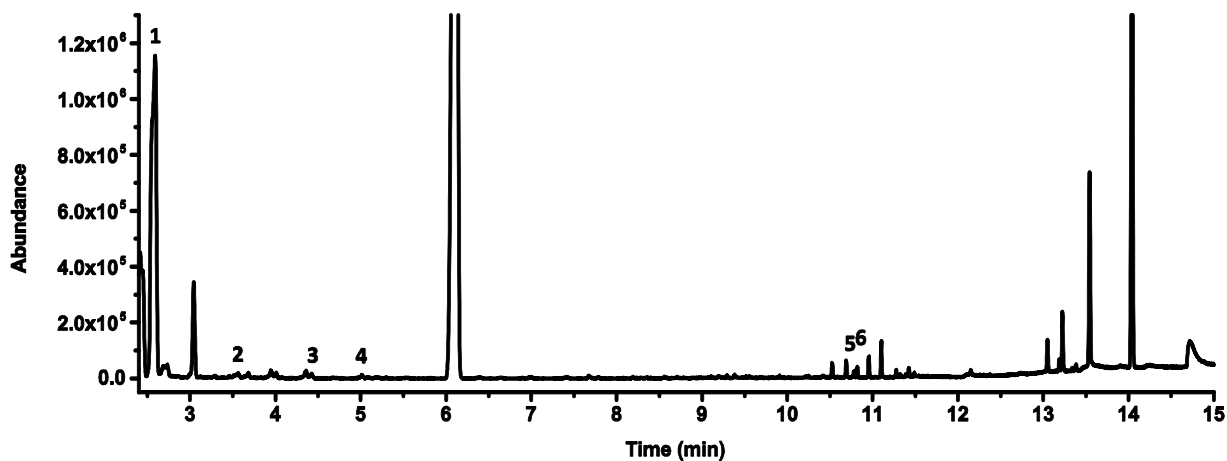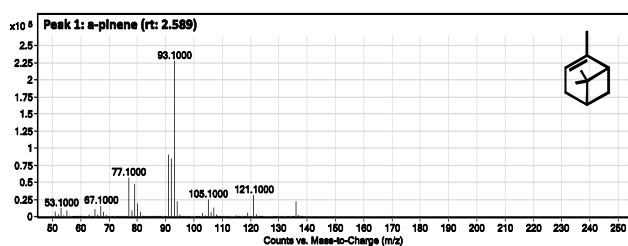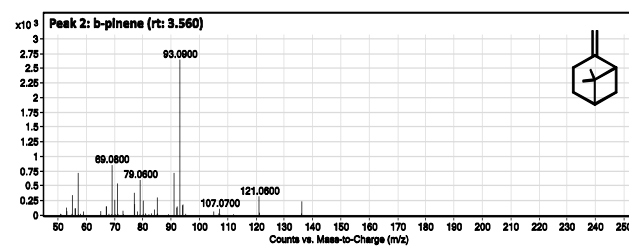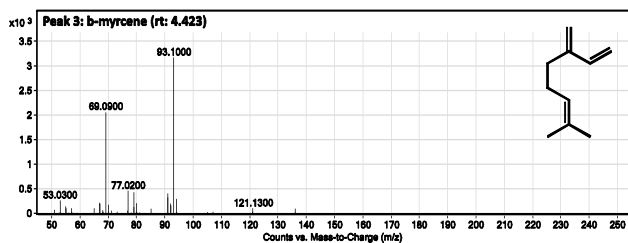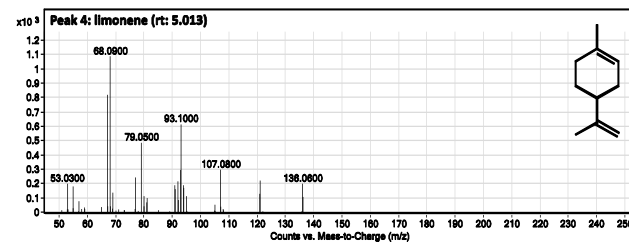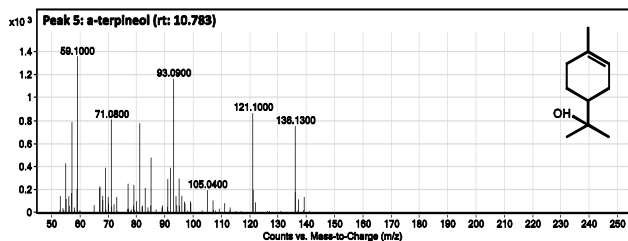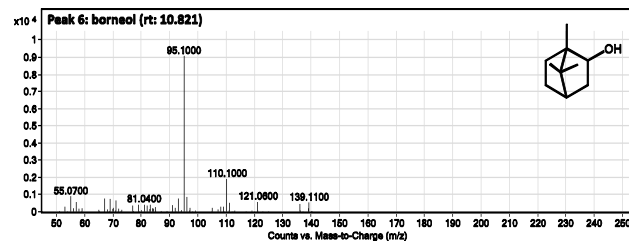

Additional terpenoids detected: neral (rt: 10.690), geraniol (rt: 10.957), citronellol (rt: 11.101), nerol (rt: 11.278), geraniol (rt: 11.490), and farnesol (rt: 13.542). The peak at rt 14.039 is indole.

## F) CinS\_Sf

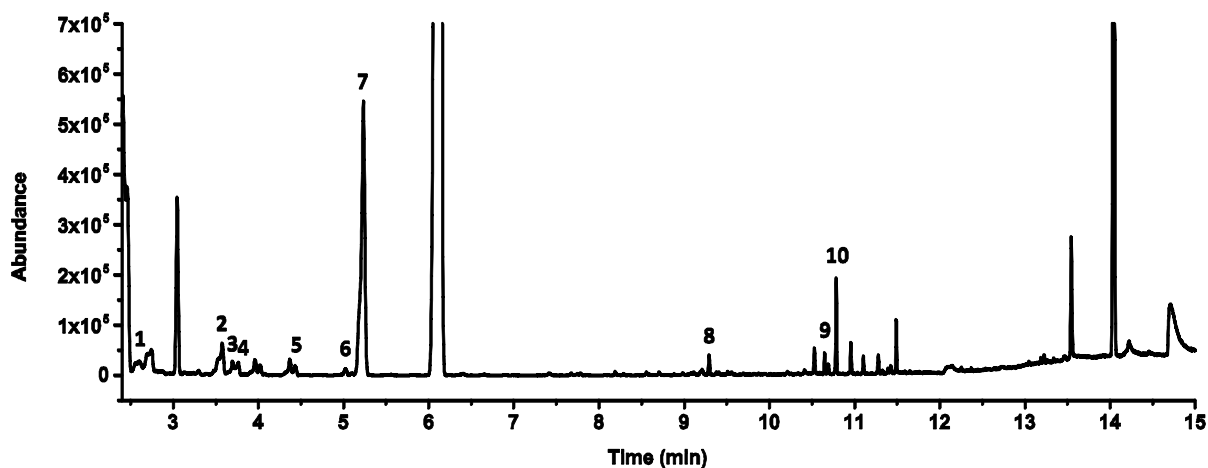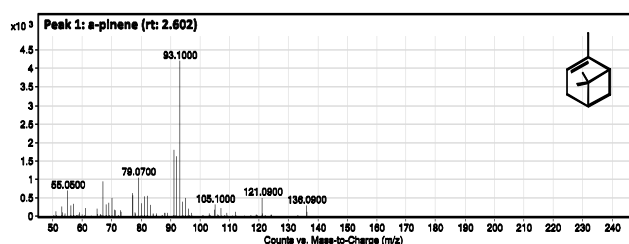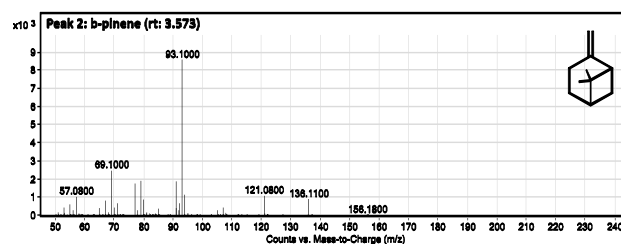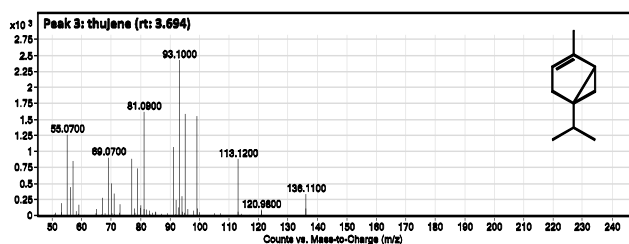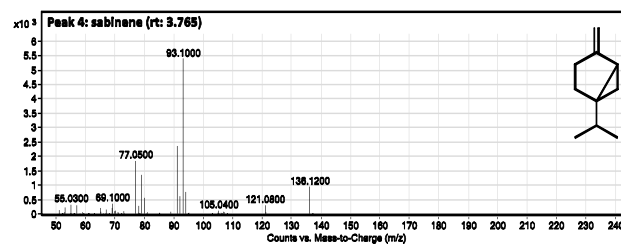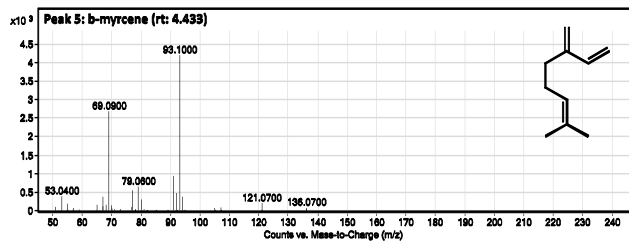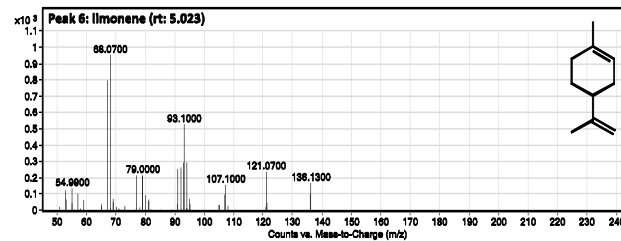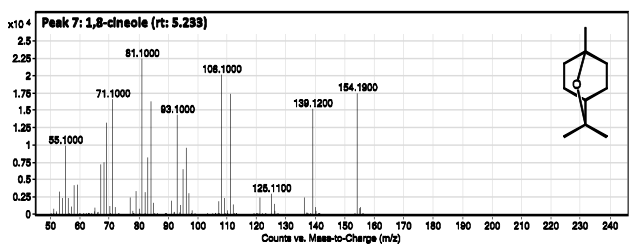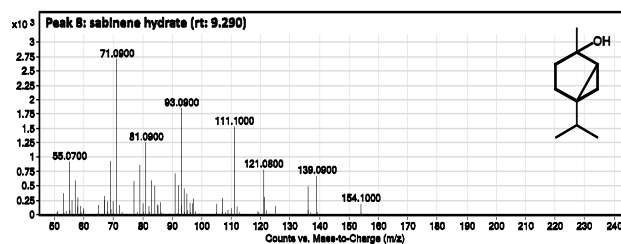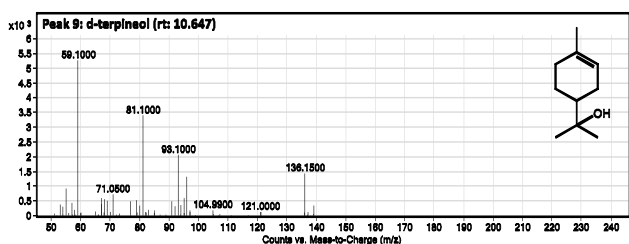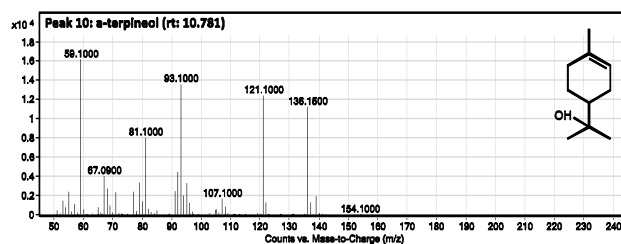

Additional terpenoids detected: neral (rt: 10.690), geranial (rt: 10.955), citronellol (rt: 11.101), nerol (rt: 11.278), geraniol (rt: 11.487), and farnesol (rt: 13.542). The peak at rt 14.039 is indole.

G) (-)bPinS\_Aa

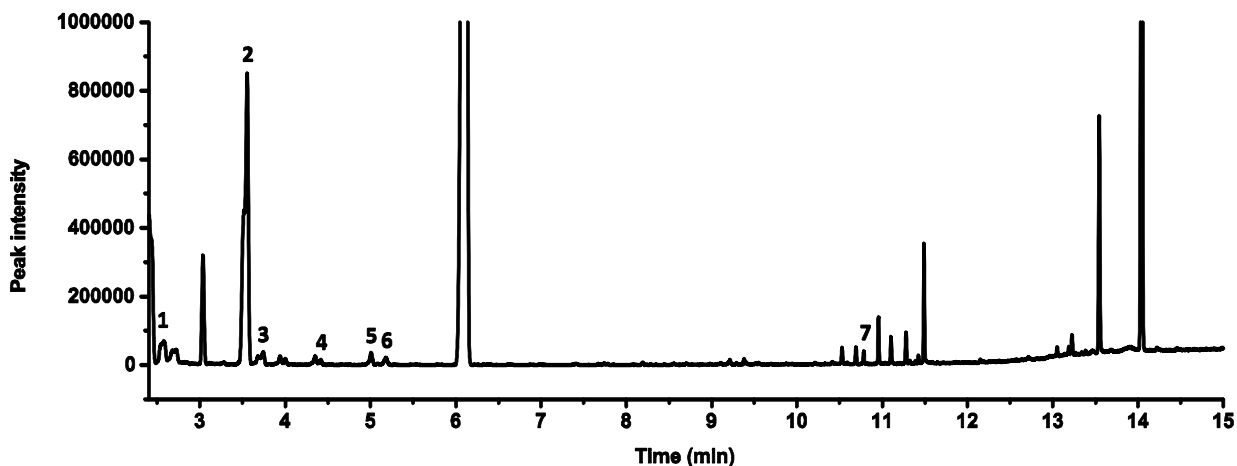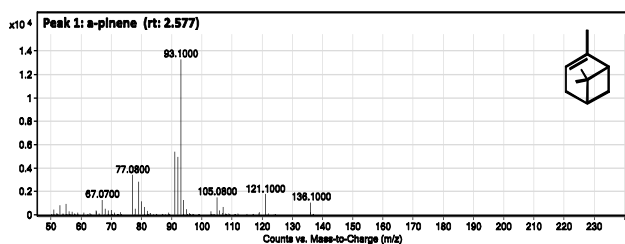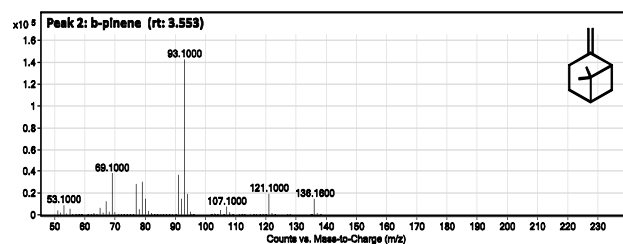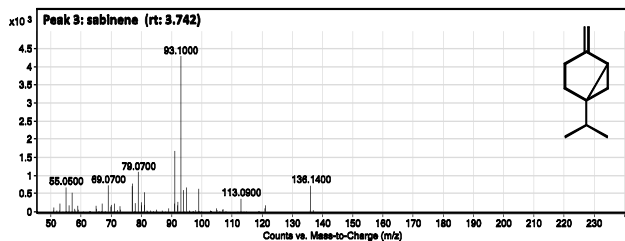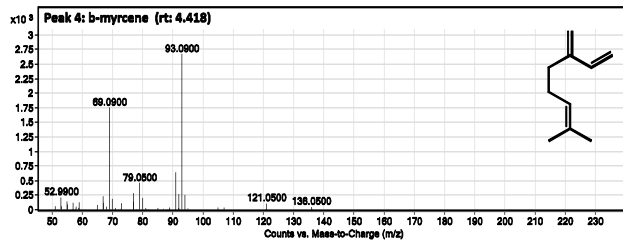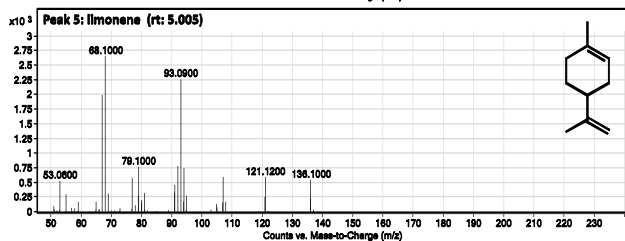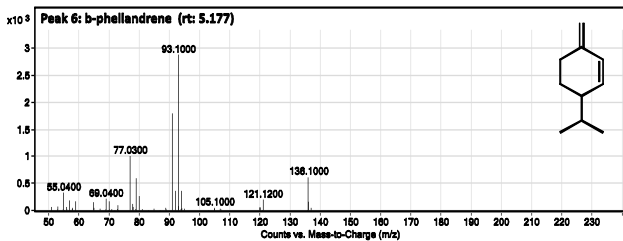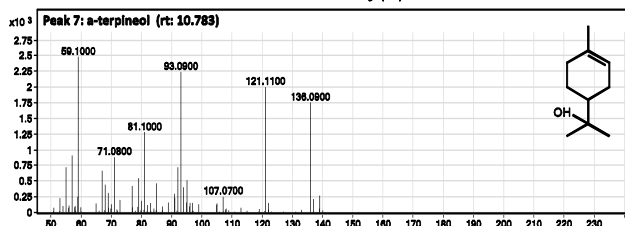

Additional terpenoids detected: neral (rt: 10.690), geranial (rt: 10.957), citronellol (rt: 11.101), nerol (rt: 11.278), geraniol (rt: 11.487), and farnesol (rt: 13.542). The peak at rt 14.039 is indole.

### H) GerS\_Pc

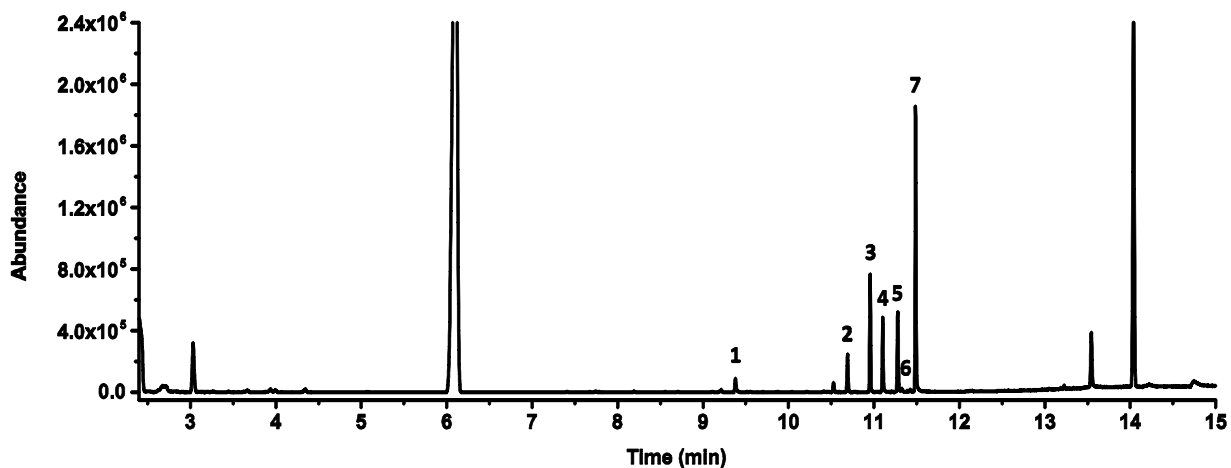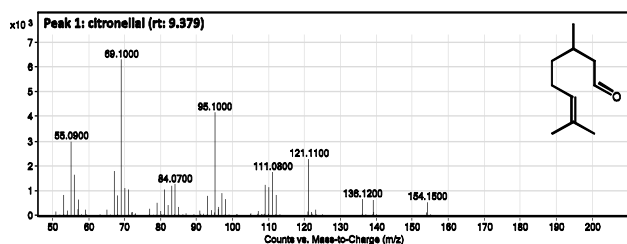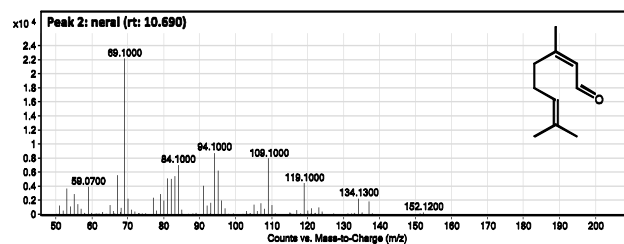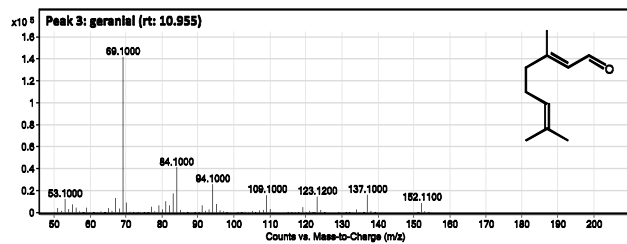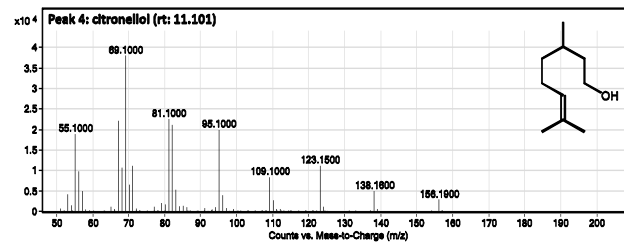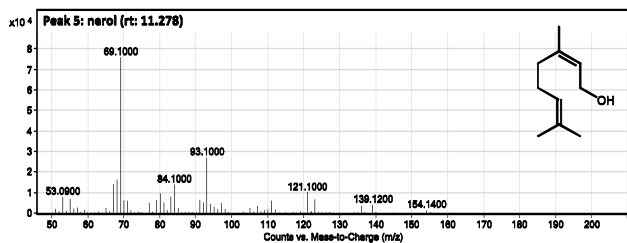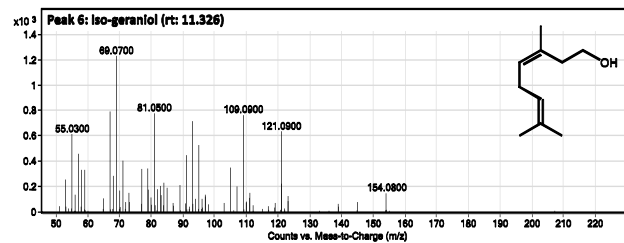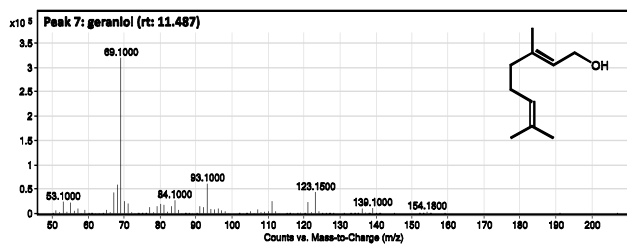

Additional terpenoids detected: farnesol (rt: 13.542). The peak at rt 14.037 is indole.

# I) CinS\_At

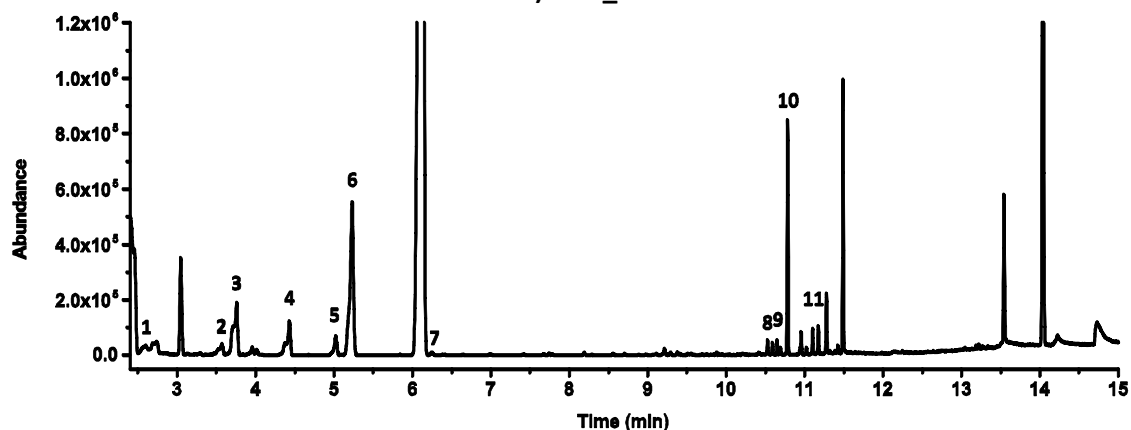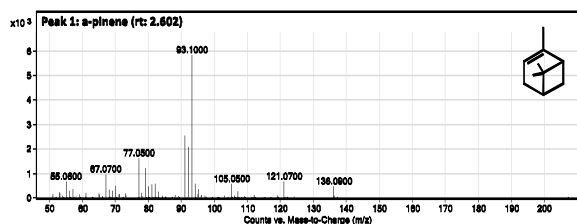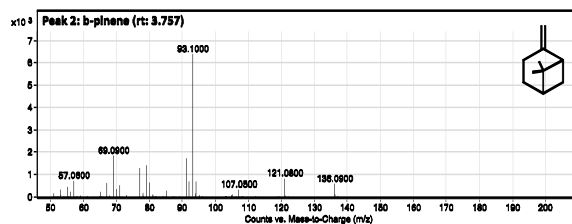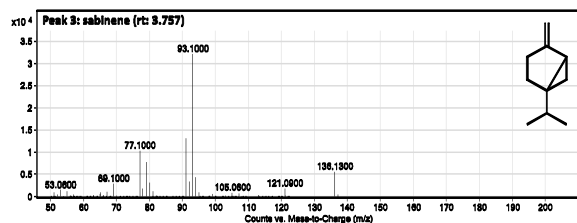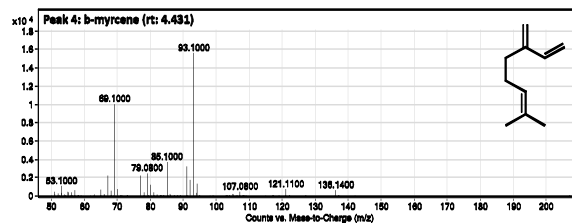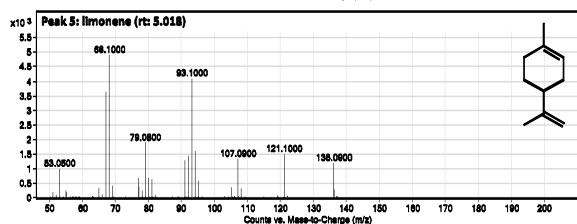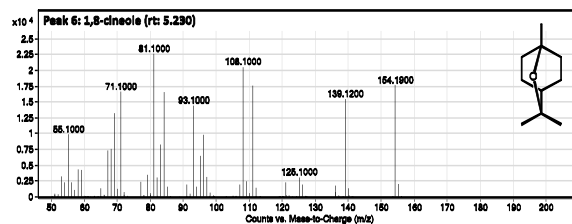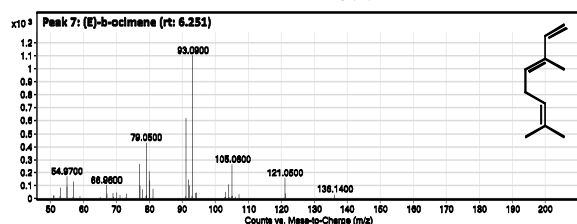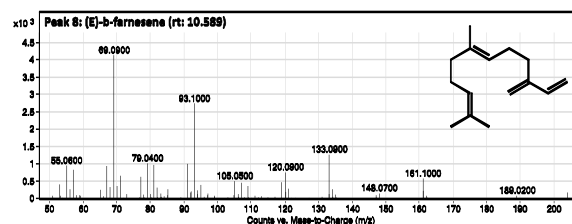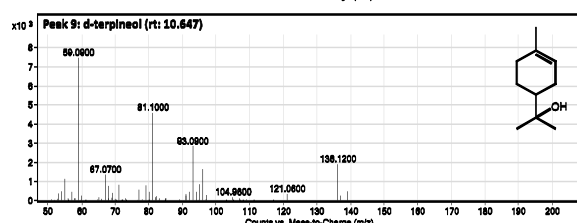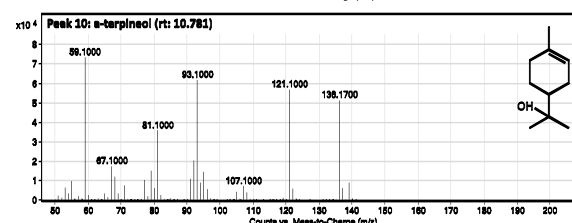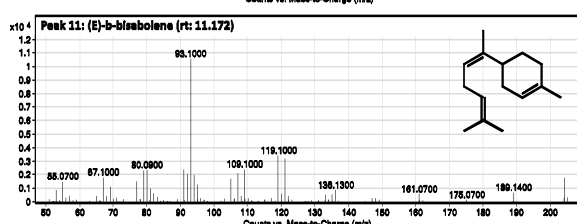

Additional terpenoids detected: geraniol (rt: 10.955), citronellol (rt: 11.101), nerol (rt: 11.278), geraniol (rt: 11.487), and farnesol (rt: 13.540). The peak at rt 14.037 is indole.

J) FenS\_Lv

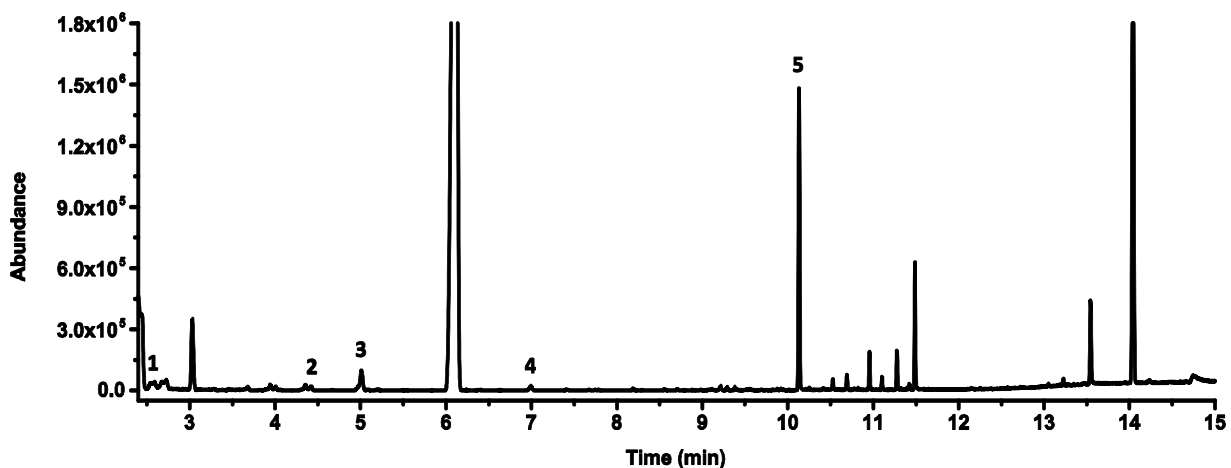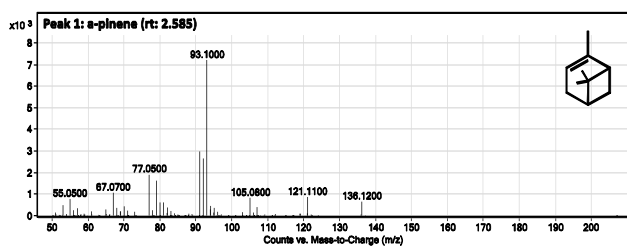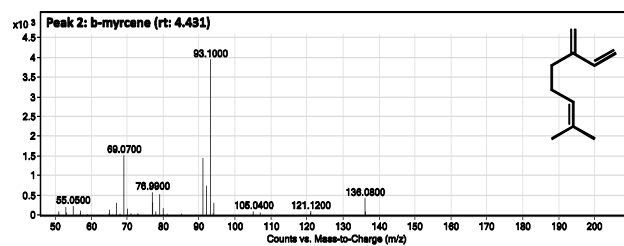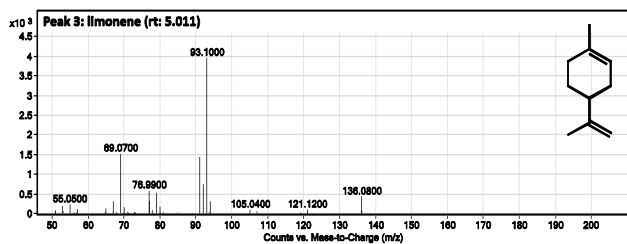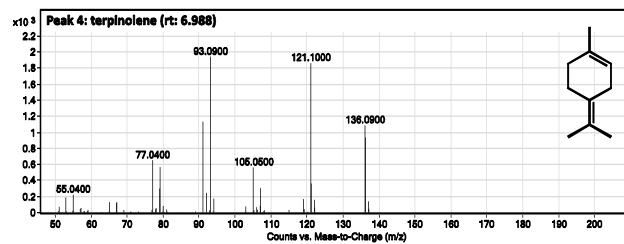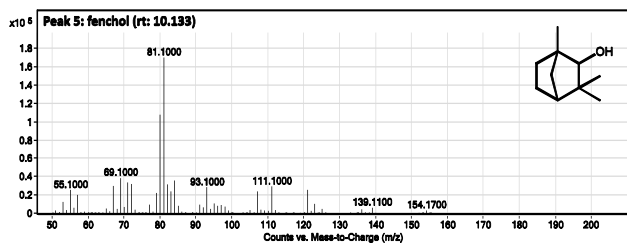

Additional terpenoids detected: citronellal (rt: 9.376), neral (rt: 10.690), geranial (rt: 10.957), citronellol (rt: 11.101), nerol (rt: 11.278), geraniol (rt: 11.487), and farnesol (rt: 13.543). The peak at rt 14.039 is indole.

K) SabS\_Sp

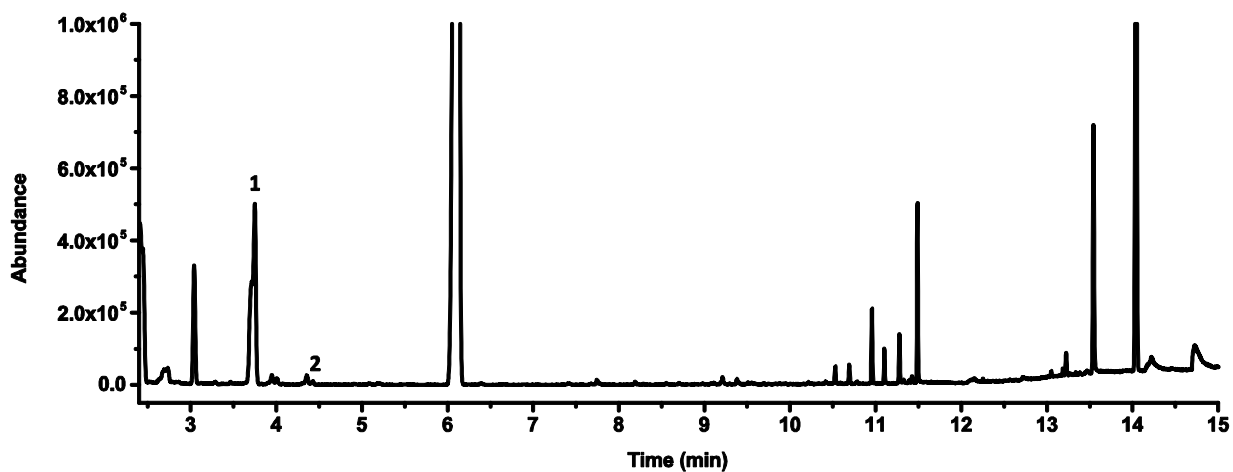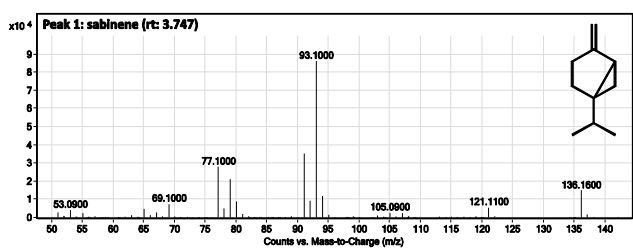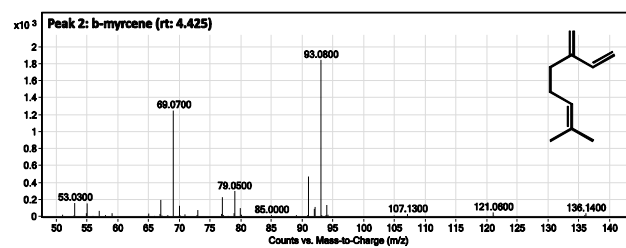

Additional terpenoids detected: neral (rt: 10.690), geranial (rt: 10.959), citronellol (rt: 11.101), nerol (rt: 11.278), geraniol (rt: 11.489), farnesal (rt: 13.224), and farnesol (rt: 13.543). The peak at rt 14.039 is indole.



### L) aTerS\_Mg

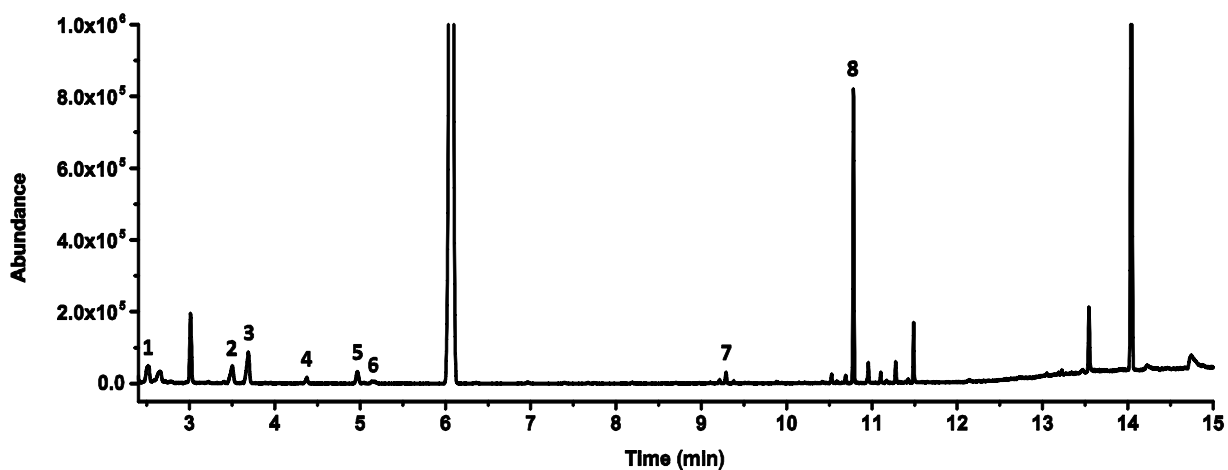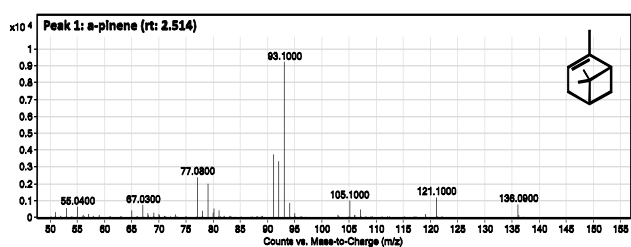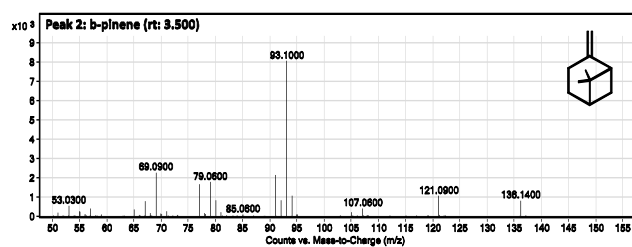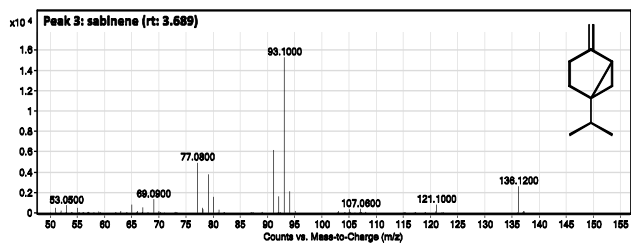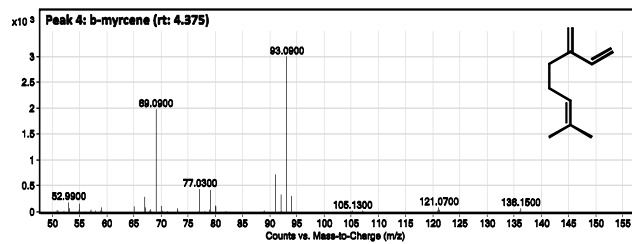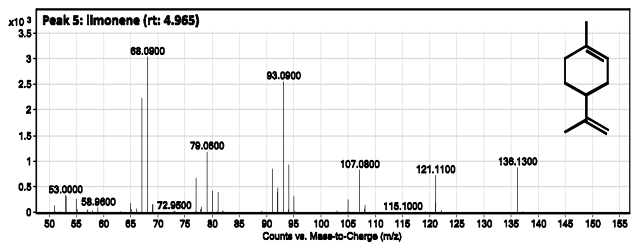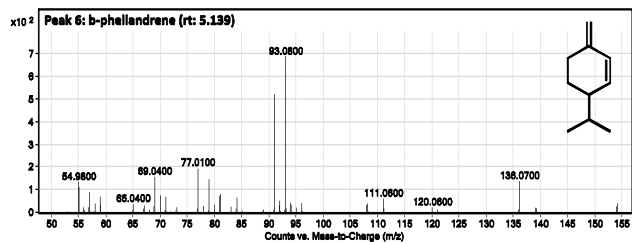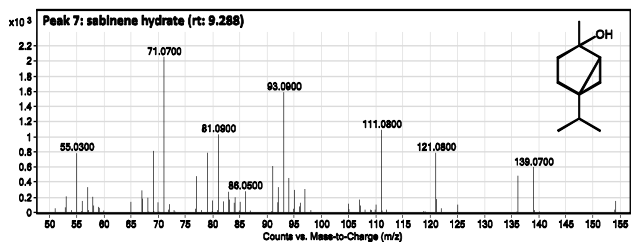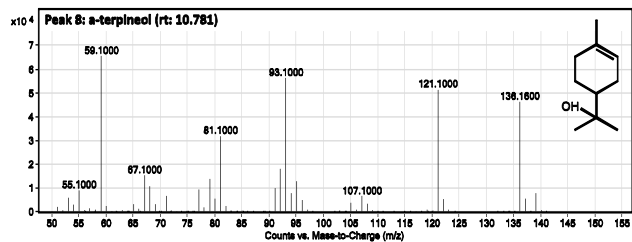

Additional terpenoids detected: neral (rt: 10.690), geranial (rt: 10.957), citronellol (rt: 11.101), nerol (rt: 11.278), geraniol (rt: 11.487), and farnesol (rt: 13.542). The peak at rt 14.039 is indole

M) OciS\_Am

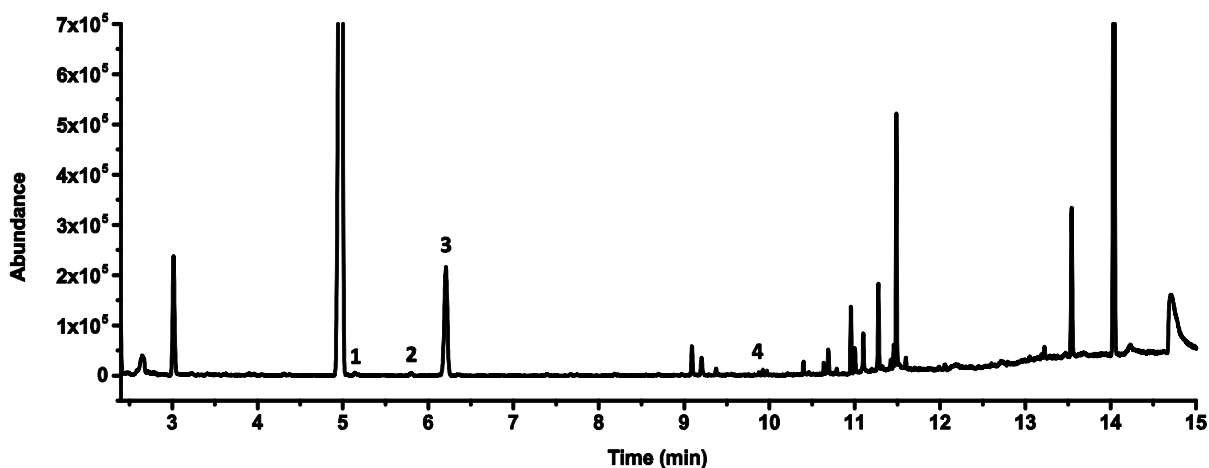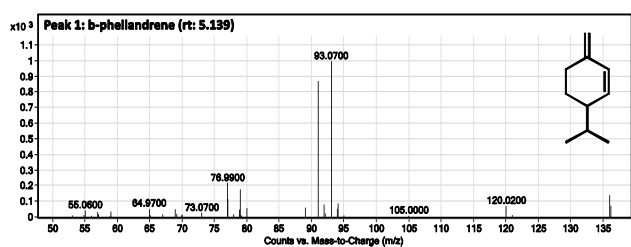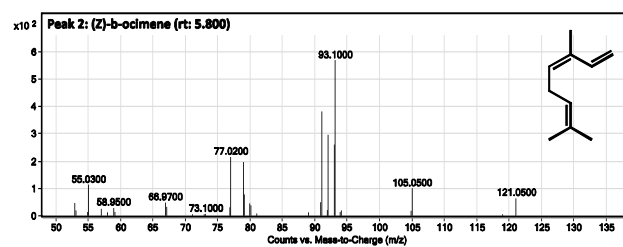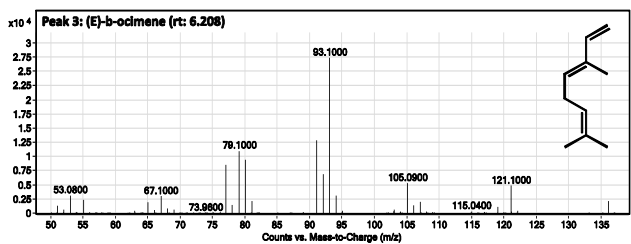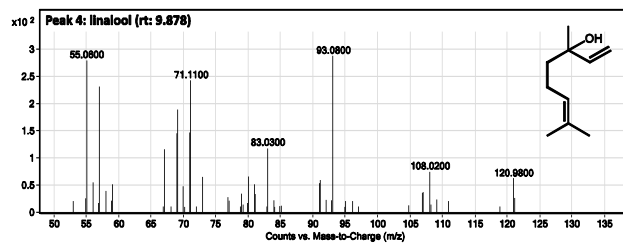

Additional terpenoids detected: neral (rt: 10.690), geranial (rt: 10.955), citronellol (rt: 11.101), nerol (rt: 11.278), geraniol (rt: 11.487), and farnesol (rt: 13.542). The peak at rt 14.037 is indole.

N) CamS\_SI

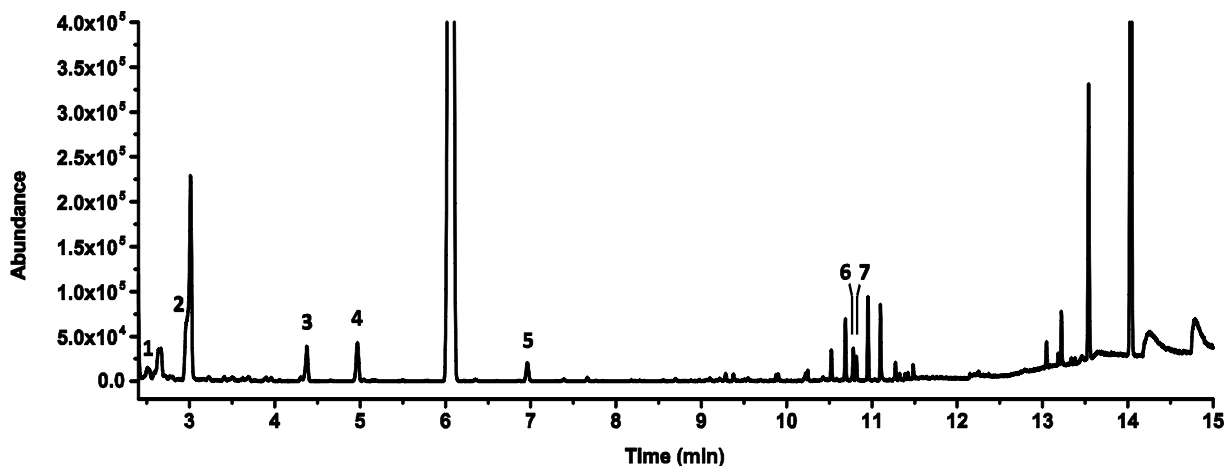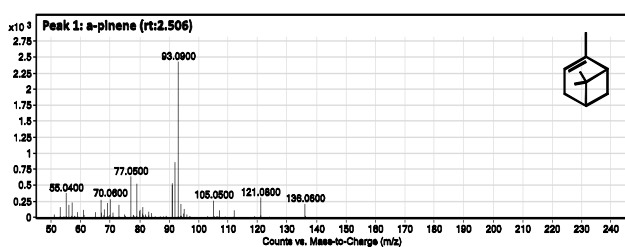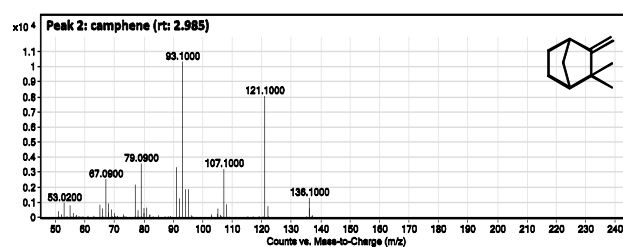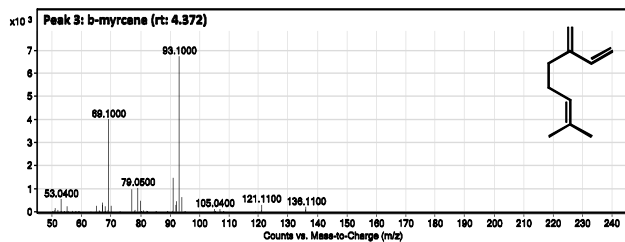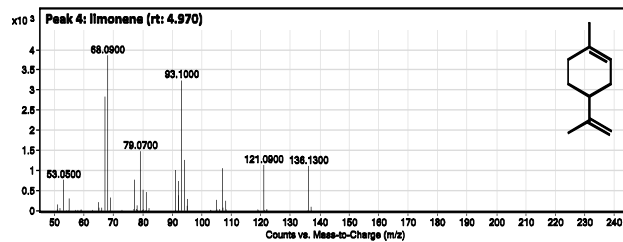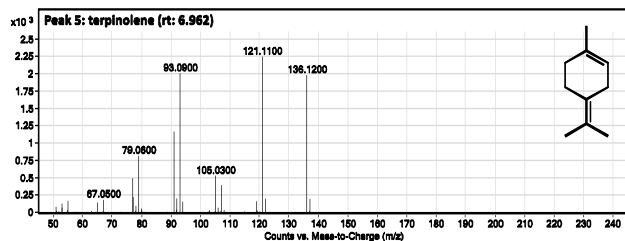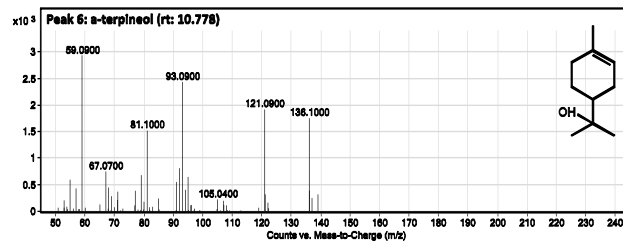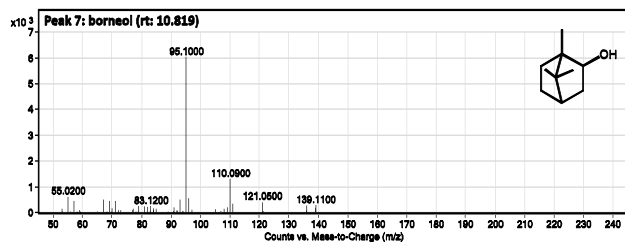

Additional terpenoids detected: neral (rt: 10.687), geranial (rt: 10.955), citronellol (rt: 11.098), nerol (rt: 11.275), geraniol (rt: 11.484), and farnesol (rt: 13.540). The peak at rt 14.034 is indole.

## O) CinS\_Cu

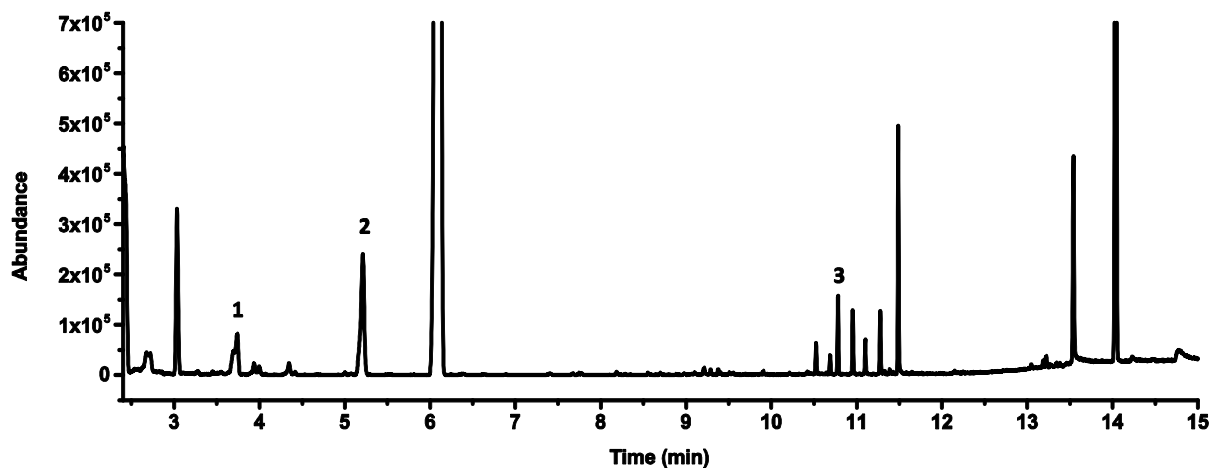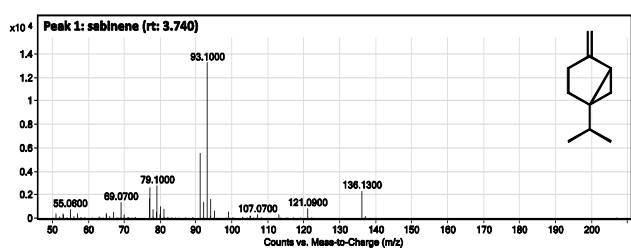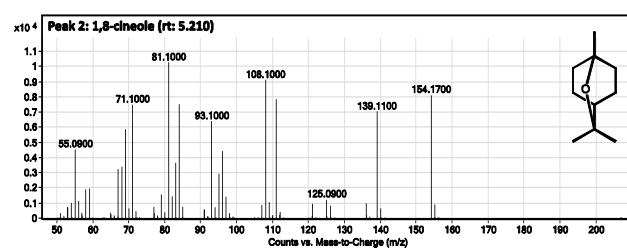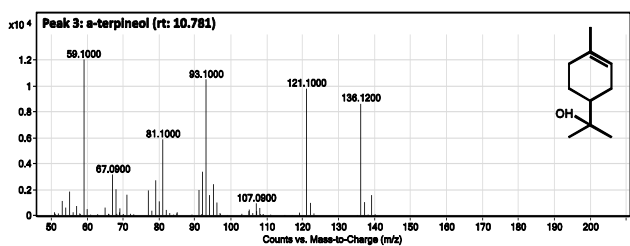

Additional terpenoids detected: neral (rt: 10.688), geraniol (rt: 10.955), citronellol (rt: 11.101), nerol (rt: 11.278), geraniol (rt: 11.487), and farnesol (rt: 13.540). The peak at rt 14.034 is indole.

P) (-)αPinS\_Ps

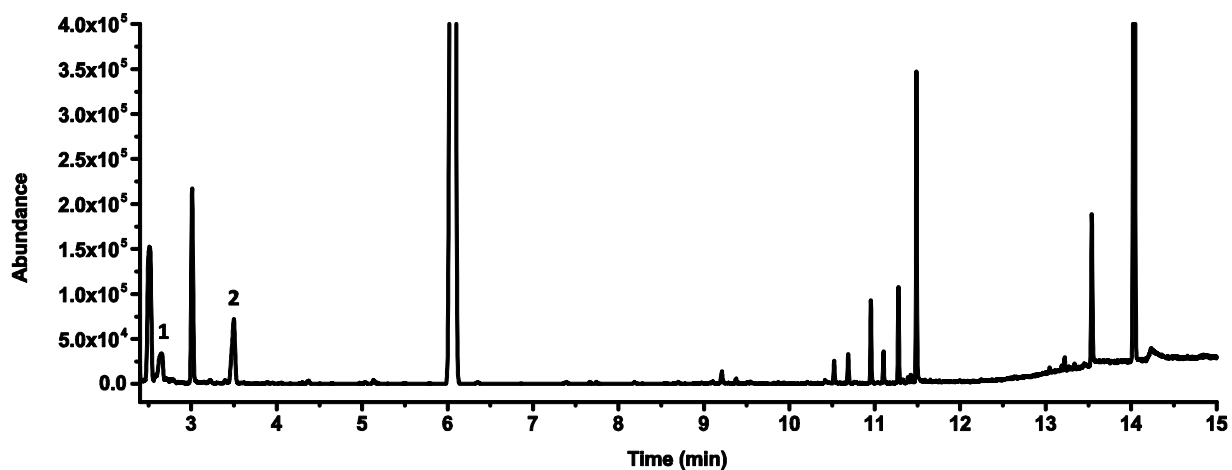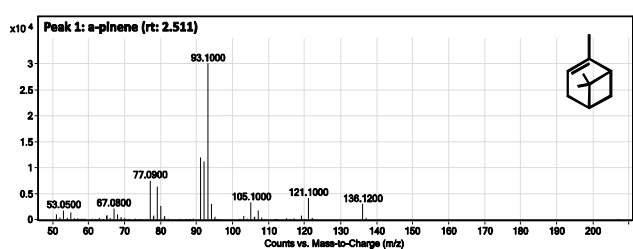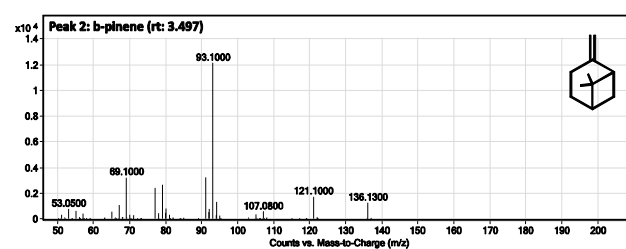

Additional terpenoids detected: neral (rt: 10.688), geraniol (rt: 10.955), citronellol (rt: 11.101), nerol (rt: 11.278), geraniol (rt: 11.487), and farnesol (rt: 13.540). The peak at rt 14.034 is indole.

Q) CarS\_Pa

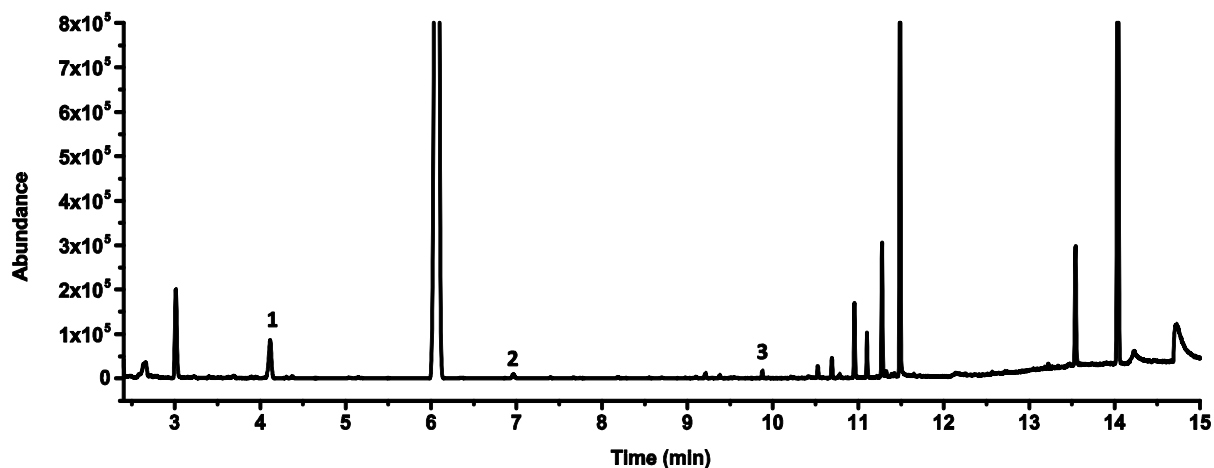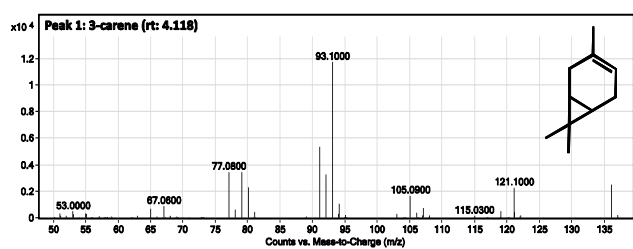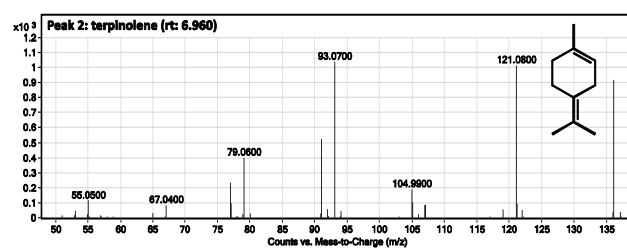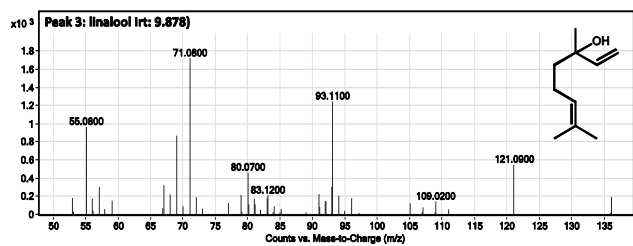

Additional terpenoids detected: neral (rt: 10.690), geranial (rt: 10.955), citronellol (rt: 11.101), nerol (rt: 11.278), geraniol (rt: 11.487), and farnesol (rt: 13.542). The peak at rt 14.037 is indole.

R) GerS\_Ob

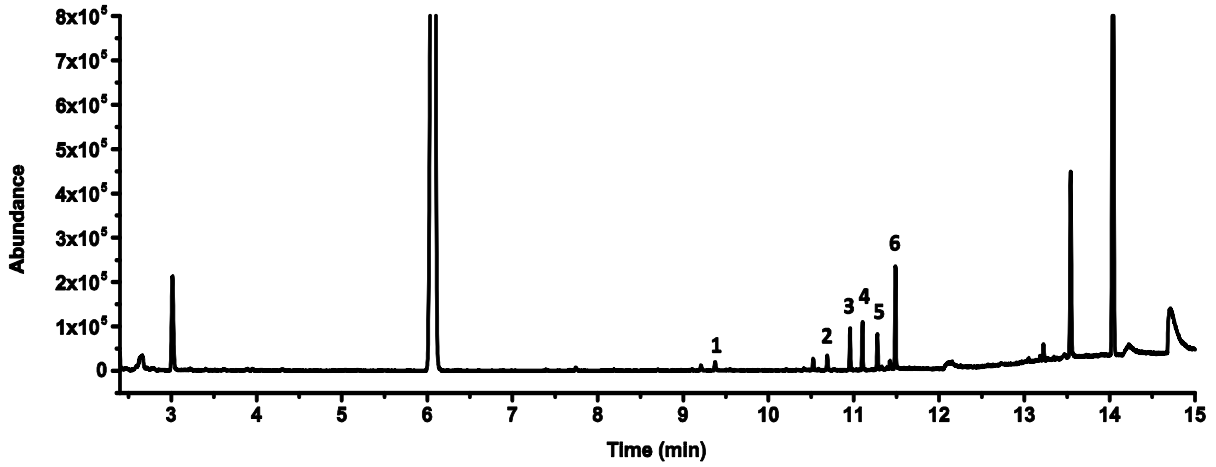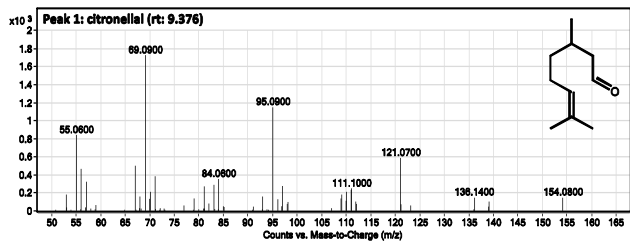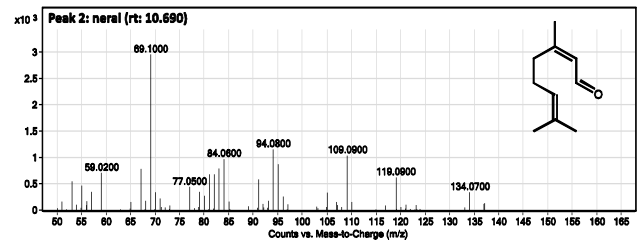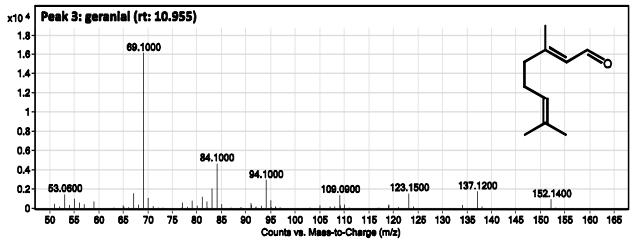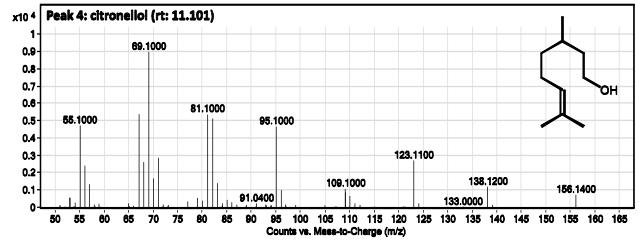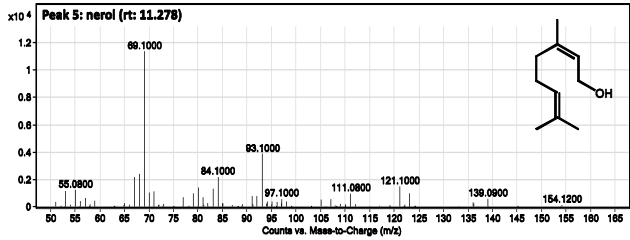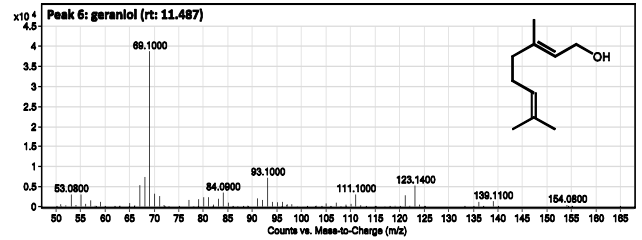

Additional terpenoids detected: farnesal (rt: 13.222), and farnesol (rt: 13.543). The peak at rt 14.039 is indole.

S) GerS\_Ct

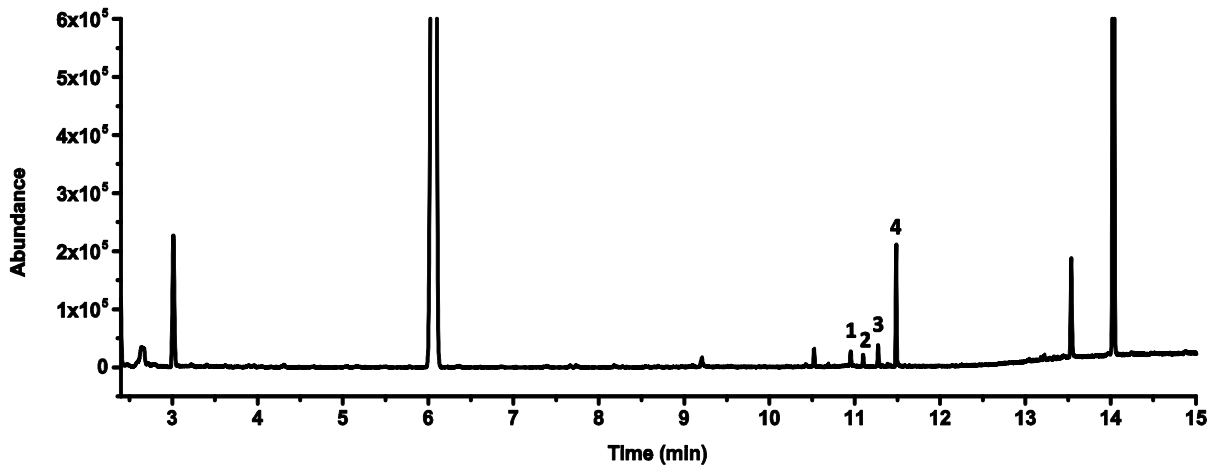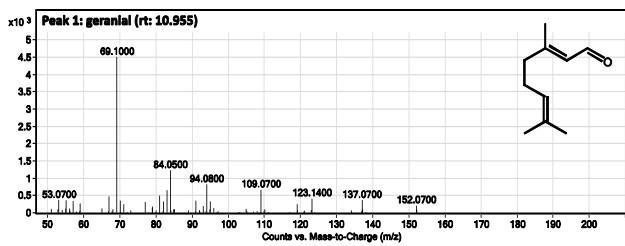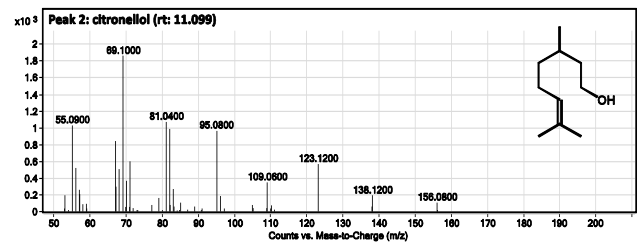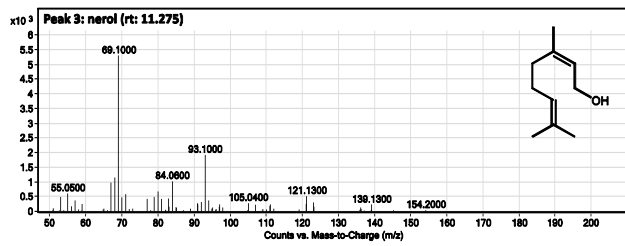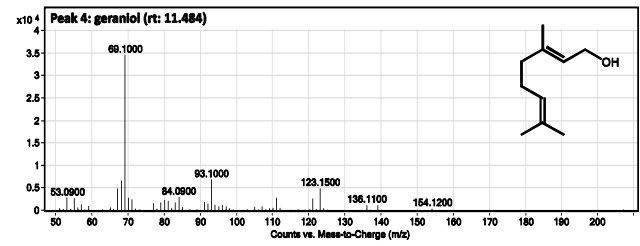

Additional terpenoids detected: farnesol (rt: 13.537). The peak at rt 14.032 is indole.



T) RLinS\_Aa

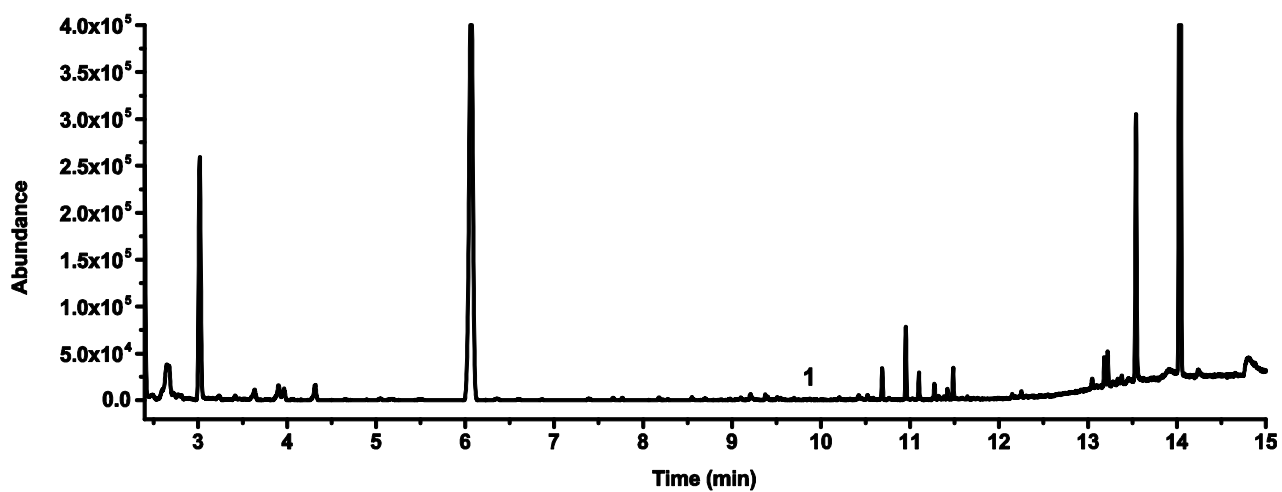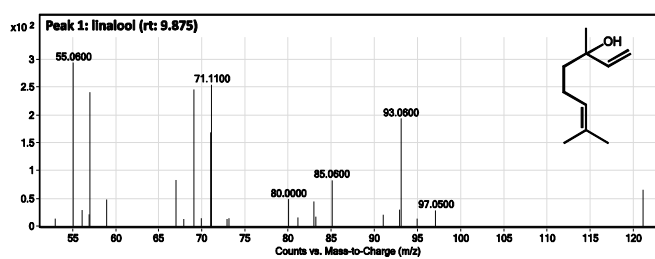

Additional terpenoids detected: neral (rt: 10.687), geranial (rt: 10.952), citronellol (rt: 11.099), nerol (rt: 11.275), geraniol (rt: 11.484), and farnesol (rt: 13.540). The peak at rt 14.034 is indole.

**Table S5: Product profiles and monoterpenoid titres of production strains.** Product profiles and monoterpenoid titres (mg L<sub>org</sub><sup>-1</sup>) are determined from two-phase cultures with an *n*-nonane overlay for each *E. coli* strain containing the MVA pathway and a distinct monoterpene synthase. Averages of at least 3 biological replicates per mTC/S and the corresponding standard deviations (in brackets) are shown. Highest values for each compound are highlighted in bold.

| Synthase    | Linear monoterpenoids  |                                |                       |              | Mono-cyclic monoterpenoids |                         |                       |                       |                     | Bi-cyclic monoterpenoids |                        |                       |                         |                       |                      |          | Total product        | Geranoids   | Farnesol         |                |
|-------------|------------------------|--------------------------------|-----------------------|--------------|----------------------------|-------------------------|-----------------------|-----------------------|---------------------|--------------------------|------------------------|-----------------------|-------------------------|-----------------------|----------------------|----------|----------------------|-------------|------------------|----------------|
|             | geraniol               | ( <i>E</i> )- $\beta$ -ocimene | $\beta$ -myrcene      | linalool     | limonene                   | $\gamma$ -terpinene     | $\alpha$ -terpineol   | $\beta$ -phellandrene | terpinolene         | $\alpha$ -pinene         | $\beta$ -pinene        | fenchol               | 1,8-cineole             | sabinene              | 3-carene             | camphene |                      |             |                  | other minor    |
| (-)aPinS_Pt |                        |                                | 11.2<br>(5.6)         |              | 6.6<br>(1.6)               |                         | <1                    | <b>7.4</b><br>(3.5)   |                     | <b>517.2</b><br>(132.7)  | 94.3<br>(43.1)         |                       |                         |                       |                      |          | 3.8<br>(3.3)         | <b>642</b>  | 8.1<br>(2.4)     | 41.9<br>(22.3) |
| SLimS_Ms    |                        |                                | 7.7<br>(2.6)          |              | <b>530.6</b><br>(102.3)    |                         | 2.1<br>(0.5)          |                       |                     | 5.3<br>(2.3)             | 5.7<br>(1.3)           |                       |                         | 2.3<br>(0.8)          |                      |          |                      | <b>554</b>  | 7.2<br>(4.6)     | 33.2<br>(11.5) |
| RLimS_Cl    |                        |                                | 4.3<br>(4.4)          |              | 260.0<br>(122.2)           |                         |                       |                       |                     | <1                       |                        |                       |                         |                       |                      |          |                      | <b>265</b>  | 4.4<br>(5.5)     | 17.9<br>(3.3)  |
| gTerS_Ov    |                        |                                | 3.1<br>(3.7)          |              |                            | <b>197.1</b><br>(119.7) | <1                    |                       |                     | 13.3<br>(6.1)            |                        |                       |                         | <1                    |                      |          | 18.5<br>(12.7)       | <b>232</b>  | 19.2<br>(15.7)   | 42.9<br>(42.3) |
| (+)aPinS_Pt |                        |                                | 3.2<br>(0.4)          |              | <1                         |                         | <1                    |                       |                     | 190.6<br>(31.9)          | 2.5<br>(0.5)           |                       |                         |                       |                      |          | <1                   | <b>197</b>  | 35.2<br>(12.2)   | 40.8<br>(6.1)  |
| CinS_Sf     |                        |                                | 3.2<br>(4.5)          |              | 1.9<br>(2.6)               |                         | 11.4<br>(6.3)         |                       |                     | 7.1<br>(8.7)             | 33.5<br>(39.0)         |                       | <b>118.2</b><br>(153.6) | 3.7<br>(6.7)          |                      |          | 4.0<br>(3.8)         | <b>183</b>  | 12.3<br>(8.0)    | 25.9<br>(33.2) |
| (-)bPinS_Aa |                        |                                | 3.0<br>(0.4)          |              | 2.3<br>(1.9)               |                         | 2.1<br>(0.1)          | 2.8<br>(0.4)          |                     | 12.1<br>(4.7)            | <b>145.0</b><br>(33.5) |                       |                         | 6.9<br>(1.9)          |                      |          |                      | <b>174</b>  | 48.0<br>(11.9)   | 41.1<br>(7.0)  |
| GerS_Pc     | <b>162.6</b><br>(98.2) |                                |                       |              |                            |                         |                       |                       |                     |                          |                        |                       |                         |                       |                      |          |                      | <b>163</b>  | 189.9<br>(147.4) | 30.7<br>(15.6) |
| CinS_At     |                        | <1                             | <b>17.3</b><br>(15.5) |              | 4.4<br>(3.3)               |                         | 20.7<br>(14.6)        |                       |                     | 1.9<br>(3.3)             | 3.8<br>(2.7)           |                       | 46.6<br>(32.7)          | 15.2<br>(13.1)        |                      |          | <1                   | <b>111</b>  | 47.4<br>(36.3)   | 16.6<br>(7.4)  |
| FenS_Lv     |                        |                                | 2.7<br>(2.5)          |              | 6.1<br>(6.1)               |                         |                       |                       | 1.6<br>(0.6)        | 3.1<br>(1.9)             |                        | <b>68.6</b><br>(30.9) |                         |                       |                      |          |                      | <b>82.1</b> | 79.0<br>(7.8)    | 17.6<br>(1.4)  |
| SabS_Sp     |                        |                                | 1.3<br>(1.5)          |              |                            |                         |                       |                       |                     |                          |                        |                       |                         | <b>76.6</b><br>(74.0) |                      |          |                      | <b>77.9</b> | 34.5<br>(27.5)   | 19.2<br>(12.0) |
| aTerS_Mg    |                        |                                | 1.9<br>(3.3)          |              | 3.2<br>(3.4)               |                         | <b>37.9</b><br>(36.3) | <1                    |                     | 4.9<br>(5.4)             | 6.2<br>(6.5)           |                       |                         | 9.2<br>(9.3)          |                      |          | 1.6<br>(1.6)         | <b>65.5</b> | 28.8<br>(23.5)   | 13.2<br>(7.3)  |
| OciS_Am     |                        | <b>57.3</b><br>(56.9)          |                       | <1           |                            |                         |                       |                       |                     |                          |                        |                       |                         |                       |                      |          | <1                   | <b>59.4</b> | 105.9<br>(17.6)  | 19.5<br>(9.3)  |
| CamS_Sl     |                        |                                | 10.3<br>(2.6)         |              | 7.4<br>(0.9)               |                         | 2.7<br>(0.2)          |                       | <b>3.4</b><br>(0.5) | 2.2<br>(0.4)             |                        |                       |                         |                       |                      |          | <b>12.2</b><br>(3.4) | <b>40.0</b> | 42.3<br>(12.1)   | 19.3<br>(0.8)  |
| CinS_Cu     |                        |                                |                       |              |                            |                         | 3.6<br>(4.1)          |                       |                     |                          |                        |                       | 18.2<br>(18.3)          | 7.1<br>(7.2)          |                      |          |                      | <b>28.9</b> | 37.7<br>(33.9)   | 10.3<br>(10.6) |
| (-)aPinS_Ps |                        |                                |                       |              |                            |                         |                       |                       |                     | 18.8<br>(15.5)           | 9.9<br>(7.9)           |                       |                         |                       |                      |          |                      | <b>28.7</b> | 24.7<br>(37.0)   | 8.6<br>(6.2)   |
| CarS_Pa     |                        |                                | <1                    | <1           |                            |                         |                       |                       |                     |                          |                        |                       |                         | <1                    | <b>15.9</b><br>(3.6) |          |                      | <b>19.7</b> | 65.9<br>(21.7)   | 26.6<br>(8.6)  |
| GerS_Ob     | 14.3<br>(13.8)         |                                |                       |              |                            |                         |                       |                       |                     |                          |                        |                       |                         |                       |                      |          |                      | <b>14.3</b> | 25.0<br>(24.4)   | 22.8<br>(12.3) |
| GerS_Ct     | 14.3<br>(8.4)          |                                |                       |              |                            |                         |                       |                       |                     |                          |                        |                       |                         |                       |                      |          |                      | <b>14.3</b> | 6.5<br>(2.2)     | 20.9<br>(10.5) |
| RLinS_Aa    |                        |                                |                       | 1.3<br>(1.6) |                            |                         |                       |                       |                     |                          |                        |                       |                         |                       |                      |          |                      | <b>1.3</b>  | 10.8<br>(8.4)    | 27.3<br>(12.7) |

**Table S6: Overview of all linear monoterpenoids produced.** Highest titres observed and the mTC/S responsible are shown. Averages of at least 3 biological replicates and the corresponding standard deviations are shown.

| Linear monoterpenoids              |           |                                            |                |
|------------------------------------|-----------|--------------------------------------------|----------------|
| Target linear compounds            | Structure | Titre (mg L <sub>org</sub> <sup>-1</sup> ) | Strain + mTC/S |
| geraniol                           |           | 162.6 ± 98.2                               | GerS_Pc        |
| (E)-β-ocimene                      |           | 57.3 ± 56.9                                | OciS_Am        |
| β-myrcene                          |           | 17.3 ± 15.5                                | CinS_At        |
| linalool                           |           | 0.8 ± 1.4                                  | CarS_Pa        |
| <b>Additional linear compounds</b> |           |                                            |                |
| nerol                              |           | 73.2 ± 61.8                                | GerS_Pc        |
| geranial                           |           | 56.1 ± 35.0                                | GerS_Pc        |
| citronellol                        |           | 35.1 ± 19.7                                | GerS_Pc        |
| neral                              |           | 16.8 ± 7.2                                 | GerS_Pc        |
| citronellal                        |           | 10.7 ± 2.0                                 | GerS_Pc        |
| iso-geraniol                       |           | 1.2 ± 1.4                                  | GerS_Pc        |
| (Z)-β-ocimene                      |           | 0.8 ± 1.7                                  | OciS_Am        |

**Table S7: Overview of all monocyclic monoterpenoids produced.** Highest titres observed and the mTC/S responsible are shown. Averages of at least 3 biological replicates and the corresponding standard deviations are shown.

| Monocyclic monoterpenoids              |                                                                                     |                                            |                |
|----------------------------------------|-------------------------------------------------------------------------------------|--------------------------------------------|----------------|
| Target monocyclic compounds            | Structure                                                                           | Titre (mg L <sub>org</sub> <sup>-1</sup> ) | Strain + mTC/S |
| (-)-(4S)-limonene*                     | 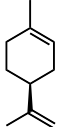   | 530.6 ± 102.3                              | SLimS_Ms       |
| (+)-(4R)-limonene*                     |    | 260.6 ± 122.2                              | RLimS_Cl       |
| γ-terpinene                            |    | 197.1 ± 119.7                              | gTerS_Ov       |
| α-terpineol                            |    | 37.9 ± 36.3                                | aTerS_Mg       |
| β-phellandrene                         |    | 7.4 ± 3.5                                  | (-)aPinS_Pt    |
| terpinolene                            |  | 3.4 ± 0.5                                  | CamS_Sl        |
| <b>Additional monocyclic compounds</b> |                                                                                     |                                            |                |
| δ-terpineol                            |  | 0.7 ± 1.3                                  | CinS_At        |

\* Stereoisomers identified based on published product profiles

**Table S8: Overview of all bicyclic monoterpenoids produced.** Highest titres observed and the mTC/S responsible are shown. Averages of at least 3 biological replicates and the corresponding standard deviations are shown.

| Bicyclic monoterpenoids              |                                                                                     |                                            |                |
|--------------------------------------|-------------------------------------------------------------------------------------|--------------------------------------------|----------------|
| Target bicyclic compounds            | Structure                                                                           | Titre (mg L <sub>org</sub> <sup>-1</sup> ) | Strain + mTC/S |
| (-)- $\alpha$ -pinene*               |    | 517.2 $\pm$ 132.7                          | (-)aPinS_Pt    |
| (+)- $\alpha$ -pinene*               |    | 190.6 $\pm$ 31.9                           | (+)aPinS_Pt    |
| (-)- $\beta$ -pinene*                |    | 145.0 $\pm$ 33.5                           | (-)bPinS_Aa    |
| 1,8-cineole                          |    | 118.2 $\pm$ 153.6                          | CinS_Sf        |
| sabinene                             |    | 76.6 $\pm$ 74.0                            | SabS_Sp        |
| fenchol                              |    | 68.6 $\pm$ 30.9                            | FenS_Lv        |
| 3-carene                             |   | 15.9 $\pm$ 3.6                             | CarS_Pa        |
| camphene                             |  | 12.2 $\pm$ 3.4                             | CamS_Sl        |
| <b>Additional bicyclic compounds</b> |                                                                                     |                                            |                |
| 4-carene                             |  | 18.5 $\pm$ 12.7                            | gTerS_Ov       |
| sabinene hydrate                     |  | 2.7 $\pm$ 4.1                              | CinS_Sf        |
| thujene                              |  | 0.5 $\pm$ 0.1                              | CinS_Sf        |
| borneol                              |  | 1.8 $\pm$ 0.1                              | CamS_Sl        |
| pinan-2-ol                           |  | 0.8 $\pm$ 0.7                              | (-)aPinS_Pt    |

\* Stereoisomers identified based on published product profiles

**Table S9: Overview of all additional terpenoids produced.** Highest titres observed and the mTC/S responsible are shown. Averages of at least 3 biological replicates and the corresponding standard deviations are shown.

| Sesquiterpenoids | Structure                                                                         | Titre (mg L <sub>org</sub> <sup>-1</sup> ) | Strain + mTC/S |
|------------------|-----------------------------------------------------------------------------------|--------------------------------------------|----------------|
| farnesol         | 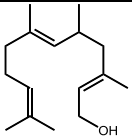 | 46.6 ± 38.9                                | PheS_SI        |
| farnesal         |  | 3.7 ± 2.1                                  | SLimS_Ms       |
| (E)-α-bisabolene |  | 1.4 ± 2.4                                  | CinS_At        |
| farnesene        |  | 0.5 ± 0.9                                  | CinS_At        |

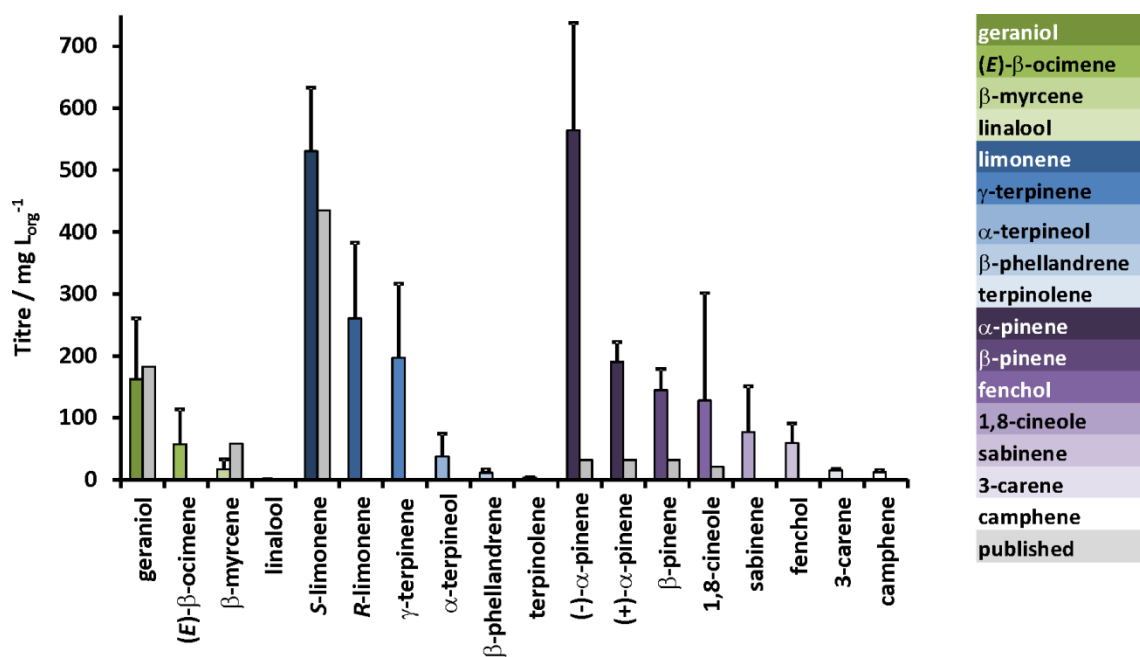

**Figure S5: Titres produced in the platform vs. previously published titres.** Monoterpenoid titres produced using our platform are shown in coloured bars, previously published titres are in grey bars. Published values: geraniol: 182.5 mg L<sup>-1</sup> [39]; β-myrcene: 58.2 mg L<sup>-1</sup> [40]; linalool: 0.1 mg L<sup>-1</sup> [41]; limonene: 435 mg L<sup>-1</sup> [1]; pinene: 32 mg L<sup>-1</sup> [42]; 1,8-cineole: 21 mg L<sup>-1</sup> [43]. Error bars represent the standard deviation of at least 3 biological replicates.

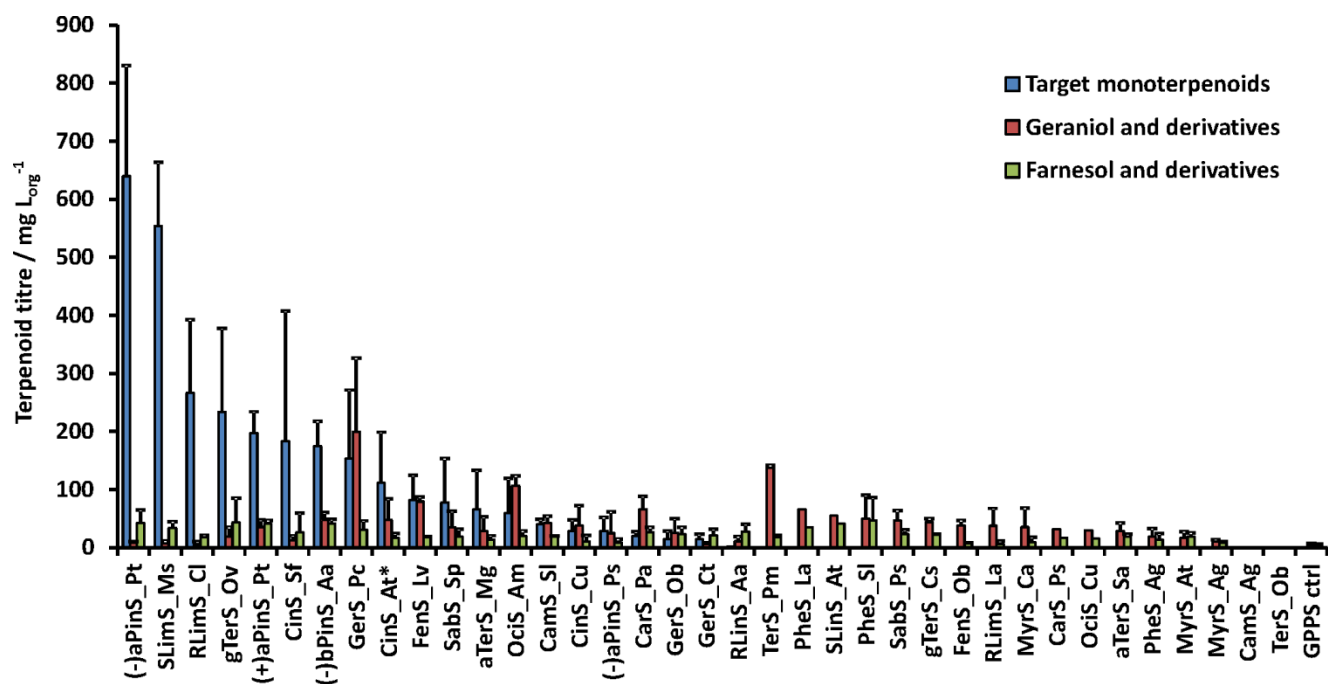

**Figure S6: Monoterpenoid, geraniol and farnesol titres detected for each strain.** Monoterpenoid titres produced using our platform are shown in blue bars, geraniol and derivatives in red bars, and farnesol and derivatives in green bars. Error bars represent the standard deviation of at least 3 biological replicates.



## References

- [1] J. Alonso-Gutierrez, R. Chan, T. S. Batth, P. D. Adams, J. D. Keasling, C. J. Petzold, T. S. Lee, *Metab Eng* **2013**, *19*, 33-41.
- [2] T. S. Lee, R. A. Krupa, F. Zhang, M. Hajimorad, W. J. Holtz, N. Prasad, S. K. Lee, J. D. Keasling, *Journal of Biological Engineering* **2011**, *5*, 1-14.
- [3] S. de Kok, et al., *ACS Synth Biol* **2014**, *3*, 97-106.
- [4] D. C. Hyatt, B. Youn, Y. Zhao, B. Santhamma, R. M. Coates, R. B. Croteau, C. Kang, *Proc Natl Acad Sci U S A* **2007**, *104*, 5360-5365.
- [5] a) A. Espah Borujeni, A. S. Channarasappa, H. M. Salis, *Nucleic Acids Res* **2014**, *42*, 2646-2659; b) H. M. Salis, E. A. Mirsky, C. A. Voigt, *Nat Biotechnol* **2009**, *27*, 946-950.
- [6] F. R. Blattner, et al., *Science* **1997**, *277*, 1453-1462.
- [7] K. Hayashi, et al., *Molecular Systems Biology* **2006**, *2*.
- [8] M. Meselson, R. Yuan, *Nature* **1968**, *217*, 1110-1114.
- [9] J. Bohlmann, M. Phillips, V. Ramachandiran, S. Katoh, R. Croteau, *Arch Biochem Biophys* **1999**, *368*, 232-243.
- [10] V. Falara, et al., *Plant Physiol* **2011**, *157*, 770-789.
- [11] J. Fäldt, D. Martin, B. Miller, S. Rawat, J. Bohlmann, *Plant Mol Biol* **2003**, *51*, 119-133.
- [12] D. E. Hall, et al., *Plant J* **2011**, *65*, 936-948.
- [13] S. C. Kampranis, et al., *Plant Cell* **2007**, *19*, 1994-2005.
- [14] T. Shimada, T. Endo, H. Fujii, M. Hara, M. Omura, *Plant Science* **2005**, *168*, 987-995.
- [15] F. Chen, D. K. Ro, J. Petri, J. Gershenzon, J. Bohlmann, E. Pichersky, D. Tholl, *Plant Physiol* **2004**, *135*, 1956-1966.
- [16] Y. Iijima, R. Davidovich-Rikanati, E. Fridman, D. R. Gang, E. Bar, E. Lewinsohn, E. Pichersky, *Plant Physiol* **2004**, *136*, 3724-3736.
- [17] M. Ito, G. Honda, *Phytochemistry* **2007**, *68*, 446-453.
- [18] Y. Iijima, D. R. Gang, E. Fridman, E. Lewinsohn, E. Pichersky, *Plant Physiol* **2004**, *134*, 370-379.
- [19] T. Yang, J. Li, H. X. Wang, Y. Zeng, *Phytochemistry* **2005**, *66*, 285-293.
- [20] J. Lücker, M. K. El Tamer, W. Schwab, F. W. Verstappen, L. H. van der Plas, H. J. Bouwmeester, H. A. Verhoeven, *Eur J Biochem* **2002**, *269*, 3160-3171.
- [21] C. Landmann, B. Fink, M. Festner, M. Dregus, K.-H. Engel, W. Schwab, *Archives of Biochemistry and Biophysics* **2007**, *465*, 417-429.
- [22] S. M. Colby, W. R. Alonso, E. J. Katahira, D. J. McGarvey, R. Croteau, *J Biol Chem* **1993**, *268*, 23016-23024.
- [23] J. W. Jia, J. Crock, S. Lu, R. Croteau, X. Y. Chen, *Arch Biochem Biophys* **1999**, *372*, 143-149.
- [24] F. Chen, D. Tholl, J. C. D'Auria, A. Farooq, E. Pichersky, J. Gershenzon, *Plant Cell* **2003**, *15*, 481-494.
- [25] J. Bohlmann, C. L. Steele, R. Croteau, *J Biol Chem* **1997**, *272*, 21784-21792.
- [26] L. Del Terra, V. Lonzarich, E. Asquini, L. Navarini, G. Graziosi, F. Suggi Liverani, A. Pallavicini, *Phytochemistry* **2013**, *89*, 6-14.
- [27] J. Bohlmann, D. Martin, N. J. Oldham, J. Gershenzon, *Arch Biochem Biophys* **2000**, *375*, 261-269.
- [28] N. Dudareva, D. Martin, C. M. Kish, N. Kolosova, N. Gorenstein, J. Fäldt, B. Miller, J. Bohlmann, *Plant Cell* **2003**, *15*, 1227-1241.
- [29] Z. A. Demissie, L. S. Sarker, S. S. Mahmoud, *Planta* **2011**, *233*, 685-696.
- [30] A. L. Schillmiller, I. Schauvinhold, M. Larson, R. Xu, A. L. Charbonneau, A. Schmidt, C. Wilkerson, R. L. Last, E. Pichersky, *Proc Natl Acad Sci U S A* **2009**, *106*, 10865-10870.
- [31] S. A. McKay, W. L. Hunter, K. A. Godard, S. X. Wang, D. M. Martin, J. Bohlmann, A. L. Plant, *Plant Physiol* **2003**, *133*, 368-378.
- [32] M. A. Phillips, M. R. Wildung, D. C. Williams, D. C. Hyatt, R. Croteau, *Arch Biochem Biophys* **2003**, *411*, 267-276.
- [33] S. Lu, R. Xu, J. W. Jia, J. Pang, S. P. Matsuda, X. Y. Chen, *Plant Physiol* **2002**, *130*, 477-486.
- [34] M. Galata, L. S. Sarker, S. S. Mahmoud, *Phytochemistry* **2014**, *102*, 64-73.
- [35] C. Crocoll, J. Asbach, J. Novak, J. Gershenzon, J. Degenhardt, *Plant Mol Biol* **2010**, *73*, 587-603.
- [36] S. Lee, J. Chappell, *Plant Physiol* **2008**, *147*, 1017-1033.
- [37] C. G. Jones, C. I. Keeling, E. L. Ghisalberti, E. L. Barbour, J. A. Plummer, J. Bohlmann, *Arch Biochem Biophys* **2008**, *477*, 121-130.
- [38] D. P. Huber, R. N. Philippe, K. A. Godard, R. N. Sturrock, J. Bohlmann, *Phytochemistry* **2005**, *66*, 1427-1439.
- [39] J. Zhou, C. Wang, S.-H. Yoon, H.-J. Jang, E.-S. Choi, S.-W. Kim, *Journal of Biotechnology* **2014**, *169*, 42-50.
- [40] E. M. Kim, J. H. Eom, Y. Um, Y. Kim, H. M. Woo, *J Agric Food Chem* **2015**, *63*, 4606-4612.
- [41] a) P. Amiri, A. Shahpiri, M. A. Asadollahi, F. Momenbeik, S. Partow, *Biotechnol Lett* **2015**, *38*, 503-508; b) Y. Deng, M. Sun, S. Xu, J. Zhou, *J Appl Microbiol* **2016**, *Accepted Article*, doi: 10.1111/jam.13105; c) J. Rico, E. Pardo, M. Orejas, *Appl Environ Microbiol* **2010**, *76*, 6449-6454.
- [42] S. Sarria, B. Wong, H. Garcia Martin, J. D. Keasling, P. Peralta-Yahya, *ACS Synth Biol* **2014**, *3*, 466-475.
- [43] J. J. Shaw, T. Berbasova, T. Sasaki, K. Jefferson-George, D. J. Spakowicz, B. F. Dunican, C. E. Portero, A. Narvaez-Trujillo, S. A. Strobel, *J Biol Chem* **2015**, *290*, 8511-8526.
